# Supplementary material for: Identification of metabolites associated with prostate cancer risk: a nested case-control study with long follow-up in the Northern Sweden Health and Disease Study
Source: PubMed Central journal article supplement (PMC7376662; doi:10.1186/s12916-020-01655-1), 2020-07-23
Supplement: 12916_2020_1655_MOESM2_ESM.pdf [file 12916_2020_1655_MOESM2_ESM.pdf]

## Additional file 2: Quality control of metabolites quantified with targeted metabolomics

| Name                                | Abbreviation | Occurrence <sup>a</sup><br>(%) | CV <sub>QC</sub> <sup>b</sup><br>(%) | CV <sub>tot</sub> <sup>c</sup><br>(%) | Included <sup>d</sup> |
|-------------------------------------|--------------|--------------------------------|--------------------------------------|---------------------------------------|-----------------------|
| <b>Metabolites measured with MS</b> |              |                                |                                      |                                       |                       |
| Carnitine (free)                    | C0           | 100                            | 7.3                                  | 19.7                                  | Yes                   |
| Acetylcarnitine                     | C2           | 100                            | 7.7                                  | 35.1                                  | Yes                   |
| Propionylcarnitine                  | C3           | 100                            | 12.3                                 | 28.7                                  | Yes                   |
| Hydroxybutyrylcarnitine             | C3-DC        | 75.7                           | 19.8                                 | 64.2                                  | No                    |
| Hydroxypropionylcarnitine           | C3-OH        | 0.1                            | NA                                   | NA                                    | No                    |
| Propenoylcarnitine                  | C3:1         | 0.3                            | NA                                   | 31.7                                  | No                    |
| Butyrylcarnitine                    | C4           | 100                            | 10.4                                 | 41.1                                  | Yes                   |
| Butenoylcarnitine                   | C4:1         | 3.6                            | 13.6                                 | 30.3                                  | No                    |
| Isovalerylcarnitine                 | C5           | 97.4                           | 13.0                                 | 25.6                                  | Yes                   |
| Glutaryl carnitine                  | C5-DC        | 21.2                           | 10.8                                 | 28.1                                  | No                    |
| Methylglutaryl carnitine            | C5-M-DC      | 0.1                            | NA                                   | NA                                    | No                    |
| Hydroxyisovalerylcarnitine          | C5-OH        | 14.8                           | 31.0                                 | 30.6                                  | No                    |
| Tiglylcarnitine                     | C5:1         | 0.3                            | NA                                   | 11.3                                  | No                    |
| Glutaconylcarnitine                 | C5:1-DC      | 4.9                            | NA                                   | 112.8                                 | No                    |
| Hexanoylcarnitine                   | C6           | 20.9                           | NA                                   | 31.0                                  | No                    |
| Hexenoylcarnitine                   | C6:1         | 0.1                            | NA                                   | NA                                    | No                    |
| Pimelylcarnitine                    | C7-DC        | 70.1                           | 20.4                                 | 33.6                                  | No                    |
| Octanoylcarnitine                   | C8           | 33.7                           | 59.3                                 | 41.7                                  | No                    |
| Nonanoylcarnitine                   | C9           | 77.4                           | 30.8                                 | 34.4                                  | No                    |
| Decanoylcarnitine                   | C10          | 89.3                           | 11.2                                 | 43.9                                  | Yes                   |
| Decenoylcarnitine                   | C10:1        | 2.2                            | NA                                   | 27.6                                  | No                    |
| Decadienoylcarnitine                | C10:2        | 39.2                           | 2.8                                  | 22.1                                  | No                    |
| Dodecanoylcarnitine                 | C12          | 65.6                           | 20.6                                 | 32.7                                  | No                    |
| Dodecanedioylcarnitine              | C12-DC       | 0.0                            | NA                                   | NA                                    | No                    |
| Dodecenoylcarnitine                 | C12:1        | 2.5                            | NA                                   | 14.5                                  | No                    |
| Tetradecanoylcarnitine              | C14          | 78.4                           | 32.9                                 | 29.0                                  | No                    |
| Tetradecenoylcarnitine              | C14:1        | 100                            | 15.6                                 | 31.0                                  | No                    |
| Hydroxytetradecenoylcarnitine       | C14:1-OH     | 21.3                           | NA                                   | 29.7                                  | No                    |
| Tetradecadienoylcarnitine           | C14:2        | 64                             | 18.7                                 | 35.0                                  | No                    |
| Hydroxytetradecadienoylcarnitine    | C14:2-OH     | 12.7                           | 9.8                                  | 54.1                                  | No                    |
| Hexadecanoylcarnitine               | C16          | 100                            | 11.1                                 | 22.5                                  | Yes                   |
| Hydroxyhexadecanoylcarnitine        | C16-OH       | 8.2                            | NA                                   | 32.0                                  | No                    |
| Hexadecenoylcarnitine               | C16:1        | 7.6                            | NA                                   | 21.1                                  | No                    |
| Hydroxyhexadecanoylcarnitine        | C16:1-OH     | 11.9                           | NA                                   | 56.5                                  | No                    |
| Hexadecadienoylcarnitine            | C16:2        | 22.7                           | 18.7                                 | 29.3                                  | No                    |
| Hydroxyhexadecadienoylcarnitine     | C16:2-OH     | 0.1                            | NA                                   | NA                                    | No                    |
| Octadecanoylcarnitine               | C18          | 100                            | 17.4                                 | 25.5                                  | No                    |
| Octadecenoylcarnitine               | C18:1        | 99.4                           | 8.9                                  | 25.6                                  | Yes                   |
| Hydroxyoctadecenoylcarnitine        | C18:1-OH     | 0.3                            | NA                                   | 72.6                                  | No                    |
| Octadecadienoylcarnitine            | C18:2        | 100                            | 11.7                                 | 31.0                                  | Yes                   |
| Alanine                             | Ala          | 100                            | 10.7                                 | 24.9                                  | Yes                   |
| Arginine                            | Arg          | 100                            | 11.8                                 | 25.4                                  | Yes                   |
| Asparagine                          | Asn          | 100                            | 21.2                                 | 21.3                                  | No                    |
| Aspartate                           | Asp          | 99.2                           | 16.8                                 | 38.2                                  | No                    |
| Citrulline                          | Cit          | 100                            | 23.5                                 | 28.8                                  | No                    |
| Glutamine                           | Gln          | 100                            | 18.6                                 | 22.5                                  | No                    |
| Glutamate                           | Glu          | 100                            | 22.6                                 | 57.7                                  | No                    |
| Glycine                             | Gly          | 100                            | 16.0                                 | 27.1                                  | No                    |
| Histidine                           | His          | 100                            | 11.4                                 | 15.4                                  | Yes                   |
| Isoleucine                          | Ile          | 100                            | 13.1                                 | 19.6                                  | Yes                   |
| Leucine                             | Leu          | 100                            | 10.2                                 | 18.2                                  | Yes                   |
| Lysine                              | Lys          | 100                            | 14.0                                 | 19.4                                  | Yes                   |
| Methionine                          | Met          | 100                            | 16.0                                 | 22.7                                  | No                    |
| Ornithine                           | Orn          | 100                            | 13.6                                 | 27.5                                  | Yes                   |
| Phenylalanine                       | Phe          | 100                            | 10.5                                 | 15.3                                  | Yes                   |

**Additional file 2: (Continued)**

| Name                              | Abbreviation | Occurrence <sup>a</sup><br>(%) | CV <sub>QC</sub> <sup>b</sup><br>(%) | CV <sub>tot</sub> <sup>c</sup><br>(%) | Included <sup>d</sup> |
|-----------------------------------|--------------|--------------------------------|--------------------------------------|---------------------------------------|-----------------------|
| Proline                           | Pro          | 100                            | 11.4                                 | 25.2                                  | Yes                   |
| Serine                            | Ser          | 100                            | 19.8                                 | 28.0                                  | No                    |
| Threonine                         | Thr          | 100                            | 15.6                                 | 23.0                                  | No                    |
| Tryptophan                        | Trp          | 100                            | 14.5                                 | 19.5                                  | Yes                   |
| Tyrosine                          | Tyr          | 100                            | 13.3                                 | 22.8                                  | Yes                   |
| Valine                            | Val          | 100                            | 20.2                                 | 22.7                                  | No                    |
| Acetylmethionine                  | Ac-Orn       | 0.4                            | 25.2                                 | 53.5                                  | No                    |
| Asymmetric dimethylarginine       | ADMA         | 89.4                           | 23.3                                 | 33.8                                  | No                    |
| Alpha-aminoadipic acid            | Alpha-AAA    | 99.2                           | 20.6                                 | 45.4                                  | No                    |
| Carnosine                         | -            | 14.2                           | 52.0                                 | 137.1                                 | No                    |
| Creatinine                        | -            | 100                            | 5.4                                  | 14.3                                  | Yes                   |
| Dihydroxyphenylalanine            | DOPA         | 19.1                           | 55.5                                 | 49.4                                  | No                    |
| Dopamine                          | -            | 2.1                            | NA                                   | 122.1                                 | No                    |
| Histamine                         | -            | 0.7                            | NA                                   | 77.0                                  | No                    |
| Kynurenine                        | -            | 100                            | 16.8                                 | 25.5                                  | No                    |
| Methionine-sulfoxide              | Met-SO       | 100                            | 19.5                                 | 76.4                                  | No                    |
| Nitrotyrosine                     | Nitro-Tyr    | 2.7                            | NA                                   | 116.4                                 | No                    |
| Hydroxyproline                    | OH-Pro       | 70.6                           | 72.3                                 | 58.9                                  | No                    |
| Phenylethylamine                  | PEA          | 0.2                            | NA                                   | 17.5                                  | No                    |
| Putrescine                        | -            | 0.0                            | NA                                   | NA                                    | No                    |
| Sarcosine                         | -            | 100                            | 15.1                                 | 30.4                                  | No                    |
| Symmetric dimethylarginine        | SDMA         | 99.7                           | 46.1                                 | 52.4                                  | No                    |
| Serotonin                         | -            | 100                            | 40.1                                 | 129.2                                 | No                    |
| Spermidine                        | -            | 99.0                           | 12.6                                 | 48.6                                  | Yes                   |
| Spermine                          | -            | 18.1                           | 0.4                                  | 240.5                                 | No                    |
| Taurine                           | -            | 100                            | 11.4                                 | 26.1                                  | Yes                   |
| Phosphatidylcholine (diacyl) Cx:y | PC aa C24:0  | 31.2                           | 14.4                                 | 62.0                                  | No                    |
| Phosphatidylcholine (diacyl) Cx:y | PC aa C26:0  | 0.8                            | NA                                   | 31.1                                  | No                    |
| Phosphatidylcholine (diacyl) Cx:y | PC aa C28:1  | 100                            | 7.9                                  | 22.4                                  | Yes                   |
| Phosphatidylcholine (diacyl) Cx:y | PC aa C30:0  | 100                            | 9.9                                  | 29.3                                  | Yes                   |
| Phosphatidylcholine (diacyl) Cx:y | PC aa C30:2  | 0.1                            | NA                                   | NA                                    | No                    |
| Phosphatidylcholine (diacyl) Cx:y | PC aa C32:0  | 100                            | 9.5                                  | 20.1                                  | Yes                   |
| Phosphatidylcholine (diacyl) Cx:y | PC aa C32:1  | 100                            | 9.9                                  | 46.7                                  | Yes                   |
| Phosphatidylcholine (diacyl) Cx:y | PC aa C32:2  | 100                            | 12.1                                 | 37.0                                  | Yes                   |
| Phosphatidylcholine (diacyl) Cx:y | PC aa C32:3  | 100                            | 15.1                                 | 27.2                                  | No                    |
| Phosphatidylcholine (diacyl) Cx:y | PC aa C34:1  | 100                            | 9.1                                  | 22.0                                  | Yes                   |
| Phosphatidylcholine (diacyl) Cx:y | PC aa C34:2  | 100                            | 12.3                                 | 19.3                                  | Yes                   |
| Phosphatidylcholine (diacyl) Cx:y | PC aa C34:3  | 100                            | 12.2                                 | 25.1                                  | Yes                   |
| Phosphatidylcholine (diacyl) Cx:y | PC aa C34:4  | 100                            | 12.5                                 | 31.4                                  | Yes                   |
| Phosphatidylcholine (diacyl) Cx:y | PC aa C36:0  | 100                            | 14.2                                 | 34.9                                  | Yes                   |
| Phosphatidylcholine (diacyl) Cx:y | PC aa C36:1  | 100                            | 11.7                                 | 22.9                                  | Yes                   |
| Phosphatidylcholine (diacyl) Cx:y | PC aa C36:2  | 100                            | 10.0                                 | 18.7                                  | Yes                   |
| Phosphatidylcholine (diacyl) Cx:y | PC aa C36:3  | 100                            | 8.8                                  | 19.6                                  | Yes                   |
| Phosphatidylcholine (diacyl) Cx:y | PC aa C36:4  | 100                            | 9.7                                  | 21.3                                  | Yes                   |
| Phosphatidylcholine (diacyl) Cx:y | PC aa C36:5  | 100                            | 10.4                                 | 46.6                                  | Yes                   |
| Phosphatidylcholine (diacyl) Cx:y | PC aa C36:6  | 100                            | 11.8                                 | 36.4                                  | Yes                   |
| Phosphatidylcholine (diacyl) Cx:y | PC aa C38:0  | 100                            | 12.7                                 | 28.5                                  | Yes                   |
| Phosphatidylcholine (diacyl) Cx:y | PC aa C38:1  | 96.8                           | 22.4                                 | 42.5                                  | No                    |
| Phosphatidylcholine (diacyl) Cx:y | PC aa C38:3  | 100                            | 9.0                                  | 22.1                                  | Yes                   |
| Phosphatidylcholine (diacyl) Cx:y | PC aa C38:4  | 100                            | 10.1                                 | 23.1                                  | Yes                   |
| Phosphatidylcholine (diacyl) Cx:y | PC aa C38:5  | 100                            | 8.6                                  | 24.7                                  | Yes                   |
| Phosphatidylcholine (diacyl) Cx:y | PC aa C38:6  | 100                            | 8.6                                  | 29.2                                  | Yes                   |
| Phosphatidylcholine (diacyl) Cx:y | PC aa C40:1  | 72.8                           | 13.9                                 | 24.0                                  | Yes                   |
| Phosphatidylcholine (diacyl) Cx:y | PC aa C40:2  | 100                            | 16.0                                 | 38.3                                  | No                    |
| Phosphatidylcholine (diacyl) Cx:y | PC aa C40:3  | 100                            | 12.6                                 | 25.7                                  | Yes                   |
| Phosphatidylcholine (diacyl) Cx:y | PC aa C40:4  | 100                            | 11.3                                 | 28.4                                  | Yes                   |

## Additional file 2: (Continued)

| Name                                  | Abbreviation | Occurrence <sup>a</sup><br>(%) | CV <sub>QC</sub> <sup>b</sup><br>(%) | CV <sub>tot</sub> <sup>c</sup><br>(%) | Included <sup>d</sup> |
|---------------------------------------|--------------|--------------------------------|--------------------------------------|---------------------------------------|-----------------------|
| Phosphatidylcholine (diacyl) Cx:y     | PC aa C40:5  | 100                            | 8.9                                  | 26.7                                  | Yes                   |
| Phosphatidylcholine (diacyl) Cx:y     | PC aa C40:6  | 100                            | 8.7                                  | 32.3                                  | Yes                   |
| Phosphatidylcholine (diacyl) Cx:y     | PC aa C42:0  | 100                            | 14.1                                 | 28.9                                  | Yes                   |
| Phosphatidylcholine (diacyl) Cx:y     | PC aa C42:1  | 100                            | 13.2                                 | 28.7                                  | Yes                   |
| Phosphatidylcholine (diacyl) Cx:y     | PC aa C42:2  | 100                            | 16.0                                 | 28.5                                  | No                    |
| Phosphatidylcholine (diacyl) Cx:y     | PC aa C42:4  | 100                            | 13.6                                 | 34.5                                  | Yes                   |
| Phosphatidylcholine (diacyl) Cx:y     | PC aa C42:5  | 100                            | 13.1                                 | 29.0                                  | Yes                   |
| Phosphatidylcholine (diacyl) Cx:y     | PC aa C42:6  | 100                            | 15.7                                 | 31.7                                  | No                    |
| Phosphatidylcholine (acyl-alkyl) Cx:y | PC ae C30:0  | 99.4                           | 34.8                                 | 33                                    | No                    |
| Phosphatidylcholine (acyl-alkyl) Cx:y | PC ae C30:1  | 27.8                           | 66.8                                 | 62.7                                  | No                    |
| Phosphatidylcholine (acyl-alkyl) Cx:y | PC ae C30:2  | 100                            | 15.0                                 | 33.4                                  | Yes                   |
| Phosphatidylcholine (acyl-alkyl) Cx:y | PC ae C32:1  | 100                            | 16.6                                 | 25.4                                  | No                    |
| Phosphatidylcholine (acyl-alkyl) Cx:y | PC ae C32:2  | 100                            | 19.7                                 | 26.9                                  | No                    |
| Phosphatidylcholine (acyl-alkyl) Cx:y | PC ae C34:0  | 100                            | 11.8                                 | 25.5                                  | Yes                   |
| Phosphatidylcholine (acyl-alkyl) Cx:y | PC ae C34:1  | 100                            | 11.4                                 | 20.1                                  | Yes                   |
| Phosphatidylcholine (acyl-alkyl) Cx:y | PC ae C34:2  | 100                            | 9.3                                  | 25.0                                  | Yes                   |
| Phosphatidylcholine (acyl-alkyl) Cx:y | PC ae C34:3  | 100                            | 12.4                                 | 28.6                                  | Yes                   |
| Phosphatidylcholine (acyl-alkyl) Cx:y | PC ae C36:0  | 100                            | 27.9                                 | 52.4                                  | No                    |
| Phosphatidylcholine (acyl-alkyl) Cx:y | PC ae C36:1  | 100                            | 11.0                                 | 23.0                                  | Yes                   |
| Phosphatidylcholine (acyl-alkyl) Cx:y | PC ae C36:2  | 100                            | 10.7                                 | 22.2                                  | Yes                   |
| Phosphatidylcholine (acyl-alkyl) Cx:y | PC ae C36:3  | 100                            | 10.2                                 | 22.6                                  | Yes                   |
| Phosphatidylcholine (acyl-alkyl) Cx:y | PC ae C36:4  | 100                            | 9.7                                  | 24.5                                  | Yes                   |
| Phosphatidylcholine (acyl-alkyl) Cx:y | PC ae C36:5  | 100                            | 10.4                                 | 27.4                                  | Yes                   |
| Phosphatidylcholine (acyl-alkyl) Cx:y | PC ae C38:0  | 100                            | 13.4                                 | 29.3                                  | Yes                   |
| Phosphatidylcholine (acyl-alkyl) Cx:y | PC ae C38:1  | 58.9                           | 12.5                                 | 80.4                                  | Yes                   |
| Phosphatidylcholine (acyl-alkyl) Cx:y | PC ae C38:2  | 100                            | 13.5                                 | 31.4                                  | Yes                   |
| Phosphatidylcholine (acyl-alkyl) Cx:y | PC ae C38:3  | 100                            | 10.0                                 | 24.5                                  | Yes                   |
| Phosphatidylcholine (acyl-alkyl) Cx:y | PC ae C38:4  | 100                            | 8.8                                  | 20.7                                  | Yes                   |
| Phosphatidylcholine (acyl-alkyl) Cx:y | PC ae C38:5  | 100                            | 8.7                                  | 20.1                                  | Yes                   |
| Phosphatidylcholine (acyl-alkyl) Cx:y | PC ae C38:6  | 100                            | 11.3                                 | 26.6                                  | Yes                   |
| Phosphatidylcholine (acyl-alkyl) Cx:y | PC ae C40:0  | 100                            | 12.0                                 | 28.7                                  | Yes                   |
| Phosphatidylcholine (acyl-alkyl) Cx:y | PC ae C40:1  | 100                            | 12.4                                 | 23.5                                  | Yes                   |
| Phosphatidylcholine (acyl-alkyl) Cx:y | PC ae C40:2  | 100                            | 10.3                                 | 23.2                                  | Yes                   |
| Phosphatidylcholine (acyl-alkyl) Cx:y | PC ae C40:3  | 100                            | 10.0                                 | 33.3                                  | Yes                   |
| Phosphatidylcholine (acyl-alkyl) Cx:y | PC ae C40:4  | 100                            | 15.1                                 | 23.3                                  | No                    |
| Phosphatidylcholine (acyl-alkyl) Cx:y | PC ae C40:5  | 100                            | 10.0                                 | 23.1                                  | Yes                   |
| Phosphatidylcholine (acyl-alkyl) Cx:y | PC ae C40:6  | 100                            | 9.5                                  | 25.3                                  | Yes                   |
| Phosphatidylcholine (acyl-alkyl) Cx:y | PC ae C42:0  | 11.5                           | 13.2                                 | 20.3                                  | No                    |
| Phosphatidylcholine (acyl-alkyl) Cx:y | PC ae C42:1  | 100                            | 14.9                                 | 25.5                                  | Yes                   |
| Phosphatidylcholine (acyl-alkyl) Cx:y | PC ae C42:2  | 100                            | 12.0                                 | 22.9                                  | Yes                   |
| Phosphatidylcholine (acyl-alkyl) Cx:y | PC ae C42:3  | 100                            | 13.1                                 | 22.7                                  | Yes                   |
| Phosphatidylcholine (acyl-alkyl) Cx:y | PC ae C42:4  | 100                            | 10.7                                 | 23.7                                  | Yes                   |
| Phosphatidylcholine (acyl-alkyl) Cx:y | PC ae C42:5  | 100                            | 8.3                                  | 21.2                                  | Yes                   |
| Phosphatidylcholine (acyl-alkyl) Cx:y | PC ae C44:3  | 98.8                           | 11.7                                 | 32.8                                  | Yes                   |
| Phosphatidylcholine (acyl-alkyl) Cx:y | PC ae C44:4  | 99.9                           | 11.3                                 | 24.3                                  | Yes                   |
| Phosphatidylcholine (acyl-alkyl) Cx:y | PC ae C44:5  | 100                            | 9.9                                  | 25.5                                  | Yes                   |
| Phosphatidylcholine (acyl-alkyl) Cx:y | PC ae C44:6  | 100                            | 10.5                                 | 25.5                                  | Yes                   |
| Lysophosphatidylcholine Cx:y          | LPC C14:0    | 0.1                            | NA                                   | NA                                    | No                    |
| Lysophosphatidylcholine Cx:y          | LPC C16:0    | 100                            | 13.3                                 | 23.1                                  | Yes                   |
| Lysophosphatidylcholine Cx:y          | LPC C16:1    | 100                            | 14.3                                 | 29.8                                  | Yes                   |
| Lysophosphatidylcholine Cx:y          | LPC C17:0    | 100                            | 11.7                                 | 28.6                                  | Yes                   |
| Lysophosphatidylcholine Cx:y          | LPC C18:0    | 100                            | 9.4                                  | 23.4                                  | Yes                   |
| Lysophosphatidylcholine Cx:y          | LPC C18:1    | 100                            | 9.7                                  | 25.0                                  | Yes                   |
| Lysophosphatidylcholine Cx:y          | LPC C18:2    | 100                            | 13.9                                 | 32.1                                  | Yes                   |
| Lysophosphatidylcholine Cx:y          | LPC C20:3    | 100                            | 9.3                                  | 26.6                                  | Yes                   |
| Lysophosphatidylcholine Cx:y          | LPC C20:4    | 100                            | 10.5                                 | 27.8                                  | Yes                   |

**Additional file 2: (Continued)**

| Name                               | Abbreviation | Occurrence <sup>a</sup><br>(%) | CV <sub>QC</sub> <sup>b</sup><br>(%) | CV <sub>tot</sub> <sup>c</sup><br>(%) | Included <sup>d</sup> |
|------------------------------------|--------------|--------------------------------|--------------------------------------|---------------------------------------|-----------------------|
| Lysophosphatidylcholine Cx:y       | LPC C24:0    | 87.9                           | 12.5                                 | 63.7                                  | Yes                   |
| Lysophosphatidylcholine Cx:y       | LPC C26:0    | 71.4                           | 17.9                                 | 87.8                                  | No                    |
| Lysophosphatidylcholine Cx:y       | LPC C26:1    | 95.0                           | 17.6                                 | 81.8                                  | No                    |
| Lysophosphatidylcholine Cx:y       | LPC C28:0    | 69.0                           | 20.6                                 | 67.2                                  | No                    |
| Lysophosphatidylcholine Cx:y       | LPC C28:1    | 100                            | 17.1                                 | 44.4                                  | No                    |
| Hydroxysphingomyelin Cx:y          | SM-OH C14:1  | 100                            | 12.1                                 | 23.0                                  | Yes                   |
| Hydroxysphingomyelin Cx:y          | SM-OH C16:1  | 100                            | 12.4                                 | 23.2                                  | Yes                   |
| Hydroxysphingomyelin Cx:y          | SM-OH C22:1  | 100                            | 13.0                                 | 23.1                                  | Yes                   |
| Hydroxysphingomyelin Cx:y          | SM-OH C22:2  | 100                            | 23.3                                 | 22.3                                  | No                    |
| Hydroxysphingomyelin Cx:y          | SM-OH C24:1  | 100                            | 26.7                                 | 31.0                                  | No                    |
| Sphingomyelin Cx:y                 | SM C16:0     | 100                            | 12.6                                 | 18.7                                  | Yes                   |
| Sphingomyelin Cx:y                 | SM C16:1     | 100                            | 11.3                                 | 18.5                                  | Yes                   |
| Sphingomyelin Cx:y                 | SM C18:0     | 100                            | 11.3                                 | 20.6                                  | Yes                   |
| Sphingomyelin Cx:y                 | SM C18:1     | 100                            | 11.9                                 | 21.9                                  | Yes                   |
| Sphingomyelin Cx:y                 | SM C20:2     | 99.9                           | 18.3                                 | 48.9                                  | No                    |
| Sphingomyelin Cx:y                 | SM C22:3     | 4.4                            | 85.0                                 | 123.3                                 | No                    |
| Sphingomyelin Cx:y                 | SM C24:0     | 100                            | 20.1                                 | 27.1                                  | No                    |
| Sphingomyelin Cx:y                 | SM C24:1     | 100                            | 12.0                                 | 20.6                                  | Yes                   |
| Sphingomyelin Cx:y                 | SM C26:0     | 99.9                           | 70.2                                 | 42.5                                  | No                    |
| Sphingomyelin Cx:y                 | SM C26:1     | 99.9                           | 54.6                                 | 36.8                                  | No                    |
| Hexoses                            | H1           | 100                            | 10.6                                 | 16.7                                  | Yes                   |
| <b>Metabolites measured by NMR</b> |              |                                |                                      |                                       |                       |
| 1-Methylguanidine                  | -            | 12.9                           | 9.6                                  | 43.3                                  | No                    |
| 1-Methylhistidine                  | -            | 0.1                            | 22.2                                 | 27.0                                  | No                    |
| 1, 2-Propanediol                   | -            | 35.8                           | 6.3                                  | 51.9                                  | No                    |
| 2-Aminobutyrate                    | -            | 100                            | 11.5                                 | 23.3                                  | Yes                   |
| 2-Hydroxybutyrate                  | -            | 100                            | 5.5                                  | 34.6                                  | Yes                   |
| 2-Hydroxyisovalerate               | -            | 71.5                           | 7.0                                  | 71.0                                  | Yes                   |
| 2-Ketoglutarate                    | -            | 95.0                           | 9.1                                  | 19.4                                  | Yes                   |
| 2-Oxoisocaproate                   | -            | 99.5                           | 9.8                                  | 24.8                                  | Yes                   |
| 2-Propanol                         | -            | 41.8                           | 18.9                                 | 688.9                                 | No                    |
| 3-Hydroxybutyrate                  | -            | 100                            | 6.1                                  | 123.3                                 | Yes                   |
| 3-Hydroxyisovalerate               | -            | 96.5                           | 8.9                                  | 23.5                                  | Yes                   |
| 3-Methyl-2-oxovalerate             | -            | 63.0                           | 30.5                                 | 37.6                                  | No                    |
| 3-Methylhistidine                  | -            | 0.7                            | 23.4                                 | 78.2                                  | No                    |
| Acetate                            | -            | 100                            | 8.1                                  | 64.1                                  | Yes                   |
| Acetoacetate                       | -            | 94.9                           | 6.8                                  | 105.5                                 | Yes                   |
| Acetone                            | -            | 100                            | 15.5                                 | 57.7                                  | No                    |
| Acetylcarnitine                    | -            | 100                            | 6.2                                  | 30.0                                  | Yes                   |
| Acetylglycine                      | -            | 37.6                           | 13.4                                 | 48.1                                  | No                    |
| Alanine                            | -            | 100                            | 5.7                                  | 22.9                                  | Yes                   |
| Arginine                           | -            | 94.7                           | 8.7                                  | 14.5                                  | Yes                   |
| Asparagine                         | -            | 97.7                           | 6.9                                  | 14.9                                  | Yes                   |
| Aspartate                          | -            | 0.3                            | 15.8                                 | 24.9                                  | No                    |
| Betaine                            | -            | 100                            | 7.6                                  | 17.3                                  | Yes                   |
| Carnitine                          | -            | 100                            | 5.9                                  | 18.8                                  | Yes                   |
| Choline                            | -            | 100                            | 5.8                                  | 20.5                                  | Yes                   |
| Citrate                            | -            | 100                            | 6.2                                  | 21.7                                  | Yes                   |
| Creatine                           | -            | 100                            | 6.4                                  | 52.7                                  | Yes                   |
| Creatinine                         | -            | 100                            | 6.5                                  | 17.3                                  | Yes                   |
| Dimethylamine                      | -            | 1.5                            | 12.1                                 | 44.8                                  | No                    |
| Dimethylglycine                    | -            | 99.6                           | 6.4                                  | 40.7                                  | Yes                   |
| Dimethylsulfone                    | -            | 100                            | 7.3                                  | 45.5                                  | Yes                   |
| Ethanol                            | -            | 96.2                           | 105.6                                | 506.7                                 | No                    |
| Formate                            | -            | 99.3                           | 11.3                                 | 33.5                                  | Yes                   |
| Glucose                            | -            | 100                            | 5.8                                  | 15.8                                  | Yes                   |

**Additional file 2: (Continued)**

| Name                   | Abbreviation | Occurrence <sup>a</sup><br>(%) | CV <sub>QC</sub> <sup>b</sup><br>(%) | CV <sub>tot</sub> <sup>c</sup><br>(%) | Included <sup>d</sup> |
|------------------------|--------------|--------------------------------|--------------------------------------|---------------------------------------|-----------------------|
| Glutamate              | -            | 82.6                           | 7.3                                  | 51.4                                  | Yes                   |
| Glutamine              | -            | 100                            | 5.8                                  | 13.0                                  | Yes                   |
| Glycerol               | -            | 100                            | 70.7                                 | 71.5                                  | No                    |
| Glycine                | -            | 100                            | 7.4                                  | 20.4                                  | Yes                   |
| Hippurate              | -            | 0.1                            | 27.1                                 | 38.3                                  | No                    |
| Histidine              | -            | 100                            | 5.9                                  | 12.9                                  | Yes                   |
| Hypoxanthine           | -            | 0.7                            | 20.0                                 | 81.4                                  | No                    |
| Isobutyrate            | -            | 0.3                            | 25.7                                 | 56.8                                  | No                    |
| Isocaproate            | -            | 99.1                           | 7.2                                  | 8.5                                   | Yes                   |
| Isoleucine             | -            | 100                            | 5.8                                  | 18.6                                  | Yes                   |
| Isovalerate            | -            | 0.3                            | 55.3                                 | 123.1                                 | No                    |
| Lactate                | -            | 100                            | 5.8                                  | 39.6                                  | Yes                   |
| Leucine                | -            | 100                            | 5.6                                  | 16.3                                  | Yes                   |
| Lysine                 | -            | 100                            | 5.8                                  | 15.4                                  | Yes                   |
| Methanol               | -            | 100                            | 45.2                                 | 62.0                                  | No                    |
| Methionine             | -            | 100                            | 6.6                                  | 13.9                                  | Yes                   |
| Myo-inositol           | -            | 88.6                           | 11.0                                 | 22.4                                  | Yes                   |
| O-phosphocholine       | -            | 98.8                           | 13.7                                 | 29.8                                  | Yes                   |
| Ornithine              | -            | 100                            | 5.8                                  | 23.0                                  | Yes                   |
| Phenylalanine          | -            | 99.7                           | 6.9                                  | 13.8                                  | Yes                   |
| Proline                | -            | 100                            | 7.5                                  | 25.8                                  | Yes                   |
| Propionate             | -            | 42.3                           | 27.5                                 | 32.5                                  | No                    |
| Pyroglutamate          | -            | 1.5                            | 25.1                                 | 29.1                                  | No                    |
| Pyruvate               | -            | 99.7                           | 6.2                                  | 35.0                                  | Yes                   |
| Sarcosine              | -            | 12.5                           | 8.9                                  | 23.6                                  | No                    |
| Glutamate              | -            | 82.6                           | 7.3                                  | 51.4                                  | Yes                   |
| Glutamine              | -            | 100                            | 5.8                                  | 13.0                                  | Yes                   |
| Glycerol               | -            | 100                            | 70.7                                 | 71.5                                  | No                    |
| Glycine                | -            | 100                            | 7.4                                  | 20.4                                  | Yes                   |
| Hippurate              | -            | 0.1                            | 27.1                                 | 38.3                                  | No                    |
| Histidine              | -            | 100                            | 5.9                                  | 12.9                                  | Yes                   |
| Hypoxanthine           | -            | 0.7                            | 20.0                                 | 81.4                                  | No                    |
| Isobutyrate            | -            | 0.3                            | 25.7                                 | 56.8                                  | No                    |
| Isocaproate            | -            | 99.1                           | 7.2                                  | 8.5                                   | Yes                   |
| Isoleucine             | -            | 100                            | 5.8                                  | 18.6                                  | Yes                   |
| Isovalerate            | -            | 0.3                            | 55.3                                 | 123.1                                 | No                    |
| Lactate                | -            | 100                            | 5.8                                  | 39.6                                  | Yes                   |
| Leucine                | -            | 100                            | 5.6                                  | 16.3                                  | Yes                   |
| Lysine                 | -            | 100                            | 5.8                                  | 15.4                                  | Yes                   |
| Methanol               | -            | 100                            | 45.2                                 | 62.0                                  | No                    |
| Methionine             | -            | 100                            | 6.6                                  | 13.9                                  | Yes                   |
| Myo-inositol           | -            | 88.6                           | 11.0                                 | 22.4                                  | Yes                   |
| O-phosphocholine       | -            | 98.8                           | 13.7                                 | 29.8                                  | Yes                   |
| Ornithine              | -            | 100                            | 5.8                                  | 23.0                                  | Yes                   |
| Phenylalanine          | -            | 99.7                           | 6.9                                  | 13.8                                  | Yes                   |
| Proline                | -            | 100                            | 7.5                                  | 25.8                                  | Yes                   |
| Propionate             | -            | 42.3                           | 27.5                                 | 32.5                                  | No                    |
| Pyroglutamate          | -            | 1.5                            | 25.1                                 | 29.1                                  | No                    |
| Pyruvate               | -            | 99.7                           | 6.2                                  | 35.0                                  | Yes                   |
| Sarcosine              | -            | 12.5                           | 8.9                                  | 23.6                                  | No                    |
| Serine                 | -            | 100                            | 6.0                                  | 19.5                                  | Yes                   |
| Succinate              | -            | 89.4                           | 15.2                                 | 43.1                                  | No                    |
| Threonine              | -            | 99.7                           | 6.9                                  | 16.3                                  | Yes                   |
| Trigonelline           | -            | 0.4                            | 55.3                                 | 99.2                                  | No                    |
| Trimethylamine         | -            | 88.7                           | 7.0                                  | 35.2                                  | Yes                   |
| Trimethylamine-N-oxide | -            | 100                            | 11.8                                 | 48.2                                  | Yes                   |

**Additional file 2: (Continued)**

| <b>Name</b> | <b>Abbreviation</b> | <b>Occurrence<sup>a</sup><br/>(%)</b> | <b>CV<sub>QC</sub><sup>b</sup><br/>(%)</b> | <b>CV<sub>tot</sub><sup>c</sup><br/>(%)</b> | <b>Included<sup>d</sup></b> |
|-------------|---------------------|---------------------------------------|--------------------------------------------|---------------------------------------------|-----------------------------|
| Tyrosine    | -                   | 100                                   | 6.0                                        | 18.7                                        | Yes                         |
| Valine      | -                   | 100                                   | 5.8                                        | 16.0                                        | Yes                         |

<sup>a</sup> Occurrence (%): Percentage of measurements above the detection limit in the nested cohort.

<sup>b</sup> CV<sub>QC</sub> (%): Analytical coefficient of variation, calculated based on the measurements in the unspiked quality control (QC) samples.

<sup>c</sup> CV<sub>tot</sub> (%): Total coefficient of variation, calculated based on the measurements in the nested cohort.

<sup>d</sup> Included (Yes): Occurrence  $\geq$  50%, and CV<sub>QC</sub>  $\leq$  15%.
