# Supplementary material for: Identification of metabolites associated with prostate cancer risk: a nested case-control study with long follow-up in the Northern Sweden Health and Disease Study
Source: PubMed Central journal article supplement (PMC7376662; doi:10.1186/s12916-020-01655-1), 2020-07-23
Supplement: 12916_2020_1655_MOESM3_ESM.pdf [file 12916_2020_1655_MOESM3_ESM.pdf]

**Additional file 3: Association between individual metabolites prostate cancer risk**

| Metabolite                                                                     | 40-60 years <sup>a</sup>     |                                 | 40-50 years <sup>a</sup>     |                                 | 60 years <sup>a</sup>        |                                 |
|--------------------------------------------------------------------------------|------------------------------|---------------------------------|------------------------------|---------------------------------|------------------------------|---------------------------------|
|                                                                                | OR <sub>crude</sub> (95% CI) | p <sub>crude</sub> <sup>b</sup> | OR <sub>crude</sub> (95% CI) | p <sub>crude</sub> <sup>b</sup> | OR <sub>crude</sub> (95% CI) | p <sub>crude</sub> <sup>b</sup> |
| <b>Metabolites measured by MS and overall prostate cancer risk<sup>a</sup></b> |                              |                                 |                              |                                 |                              |                                 |
| C0                                                                             | 1.14 (0.80 – 1.61)           | 0.4763                          | 1.32 (0.76 – 2.27)           | 0.3220                          | 1.02 (0.65 – 1.62)           | 0.9258                          |
| C2                                                                             | 1.17 (0.93 – 1.45)           | 0.1762                          | 1.12 (0.81 – 1.57)           | 0.4937                          | 1.20 (0.89 – 1.61)           | 0.2305                          |
| C3                                                                             | 1.34 (1.05 – 1.71)           | 0.0206*                         | 1.21 (0.84 – 1.75)           | 0.3166                          | 1.45 (1.04 – 2.02)           | 0.0276*                         |
| C4                                                                             | 0.97 (0.80 – 1.18)           | 0.7738                          | 0.95 (0.70 – 1.27)           | 0.7083                          | 0.99 (0.76 – 1.30)           | 0.9593                          |
| C5                                                                             | 1.16 (0.88 – 1.53)           | 0.2880                          | 1.15 (0.75 – 1.77)           | 0.5310                          | 1.17 (0.82 – 1.67)           | 0.3895                          |
| C10                                                                            | 1.07 (0.89 – 1.28)           | 0.4977                          | 1.07 (0.81 – 1.42)           | 0.6244                          | 1.06 (0.83 – 1.35)           | 0.6366                          |
| C16                                                                            | 1.03 (0.75 – 1.41)           | 0.8732                          | 1.05 (0.65 – 1.72)           | 0.8326                          | 1.01 (0.66 – 1.53)           | 0.9774                          |
| C18:1                                                                          | 0.91 (0.69 – 1.20)           | 0.5182                          | 1.06 (0.70 – 1.59)           | 0.7891                          | 0.81 (0.56 – 1.17)           | 0.2633                          |
| C18:2                                                                          | 0.88 (0.70 – 1.12)           | 0.3082                          | 0.90 (0.63 – 1.29)           | 0.5611                          | 0.87 (0.63 – 1.20)           | 0.3970                          |
| Ala                                                                            | 0.96 (0.72 – 1.28)           | 0.7983                          | 0.96 (0.63 – 1.46)           | 0.8575                          | 0.97 (0.65 – 1.42)           | 0.8556                          |
| Arg                                                                            | 0.85 (0.64 – 1.11)           | 0.2296                          | 0.66 (0.44 – 1.00)           | 0.0475*                         | 1.04 (0.72 – 1.51)           | 0.8393                          |
| His                                                                            | 0.75 (0.48 – 1.19)           | 0.2259                          | 1.05 (0.55 – 2.01)           | 0.8810                          | 0.54 (0.28 – 1.04)           | 0.0645                          |
| Ile                                                                            | 1.05 (0.72 – 1.54)           | 0.7941                          | 1.00 (0.57 – 1.73)           | 0.9881                          | 1.10 (0.66 – 1.85)           | 0.7103                          |
| Leu                                                                            | 1.11 (0.75 – 1.66)           | 0.5993                          | 1.16 (0.63 – 2.15)           | 0.6271                          | 1.08 (0.63 – 1.83)           | 0.7839                          |
| Lys                                                                            | 0.79 (0.55 – 1.13)           | 0.1885                          | 0.90 (0.52 – 1.55)           | 0.7021                          | 0.71 (0.44 – 1.14)           | 0.1598                          |
| Orn                                                                            | 0.91 (0.69 – 1.19)           | 0.4932                          | 1.38 (0.89 – 2.12)           | 0.1492                          | 0.69 (0.48 – 0.98)           | 0.0400*                         |
| Phe                                                                            | 1.01 (0.64 – 1.59)           | 0.9728                          | 0.96 (0.47 – 1.93)           | 0.9000                          | 1.05 (0.58 – 1.90)           | 0.8792                          |
| Pro                                                                            | 1.10 (0.82 – 1.46)           | 0.5397                          | 1.24 (0.79 – 1.93)           | 0.3528                          | 1.00 (0.68 – 1.47)           | 0.9917                          |
| Trp                                                                            | 1.14 (0.80 – 1.63)           | 0.4583                          | 1.04 (0.62 – 1.76)           | 0.8761                          | 1.24 (0.76 – 2.01)           | 0.3877                          |
| Tyr                                                                            | 0.91 (0.66 – 1.27)           | 0.5916                          | 0.81 (0.49 – 1.34)           | 0.4120                          | 1.00 (0.65 – 1.55)           | 1.0000                          |
| Creatinine                                                                     | 1.44 (0.88 – 2.38)           | 0.1477                          | 1.44 (0.63 – 3.26)           | 0.3846                          | 1.45 (0.77 – 2.71)           | 0.2471                          |
| Spermidine                                                                     | 1.01 (0.87 – 1.17)           | 0.9199                          | 0.89 (0.71 – 1.11)           | 0.2938                          | 1.13 (0.92 – 1.39)           | 0.2604                          |
| Taurine                                                                        | 1.31 (0.97 – 1.77)           | 0.0838                          | 0.90 (0.56 – 1.45)           | 0.6576                          | 1.68 (1.13 – 2.50)           | 0.0107*                         |
| PC aa C28:1                                                                    | 1.01 (0.74 – 1.38)           | 0.9300                          | 0.91 (0.58 – 1.42)           | 0.6646                          | 1.12 (0.73 – 1.72)           | 0.5976                          |
| PC aa C30:0                                                                    | 1.08 (0.86 – 1.37)           | 0.5075                          | 1.13 (0.79 – 1.60)           | 0.5075                          | 1.05 (0.77 – 1.43)           | 0.7659                          |
| PC aa C32:0                                                                    | 1.11 (0.79 – 1.58)           | 0.5432                          | 1.17 (0.69 – 2.01)           | 0.5599                          | 1.07 (0.68 – 1.69)           | 0.7615                          |
| PC aa C32:1                                                                    | 0.92 (0.77 – 1.08)           | 0.3057                          | 0.90 (0.71 – 1.15)           | 0.4030                          | 0.93 (0.74 – 1.17)           | 0.5350                          |
| PC aa C32:2                                                                    | 0.95 (0.80 – 1.13)           | 0.5705                          | 0.95 (0.74 – 1.22)           | 0.7100                          | 0.95 (0.75 – 1.21)           | 0.6677                          |
| PC aa C34:1                                                                    | 1.07 (0.77 – 1.50)           | 0.6798                          | 0.97 (0.58 – 1.64)           | 0.9182                          | 1.15 (0.74 – 1.78)           | 0.5326                          |
| PC aa C34:2                                                                    | 1.09 (0.77 – 1.54)           | 0.6411                          | 1.02 (0.59 – 1.75)           | 0.9497                          | 1.14 (0.72 – 1.78)           | 0.5801                          |
| PC aa C34:3                                                                    | 1.00 (0.76 – 1.31)           | 0.9847                          | 0.90 (0.59 – 1.36)           | 0.6063                          | 1.08 (0.75 – 1.57)           | 0.6676                          |
| PC aa C34:4                                                                    | 1.13 (0.91 – 1.41)           | 0.2752                          | 1.04 (0.76 – 1.42)           | 0.8079                          | 1.23 (0.90 – 1.68)           | 0.1953                          |
| PC aa C36:0                                                                    | 1.18 (0.96 – 1.46)           | 0.1181                          | 1.26 (0.92 – 1.72)           | 0.1498                          | 1.12 (0.85 – 1.49)           | 0.4259                          |
| PC aa C36:1                                                                    | 1.06 (0.77 – 1.45)           | 0.7338                          | 0.90 (0.54 – 1.49)           | 0.6857                          | 1.17 (0.78 – 1.75)           | 0.4492                          |
| PC aa C36:2                                                                    | 1.11 (0.77 – 1.60)           | 0.5761                          | 1.06 (0.59 – 1.89)           | 0.8453                          | 1.14 (0.72 – 1.83)           | 0.5746                          |
| PC aa C36:3                                                                    | 1.14 (0.80 – 1.63)           | 0.4776                          | 1.09 (0.62 – 1.90)           | 0.7740                          | 1.18 (0.74 – 1.87)           | 0.4941                          |
| PC aa C36:4                                                                    | 1.36 (0.98 – 1.89)           | 0.0687                          | 1.31 (0.77 – 2.20)           | 0.3182                          | 1.40 (0.91 – 2.14)           | 0.1248                          |
| PC aa C36:5                                                                    | 1.18 (0.99 – 1.39)           | 0.0642                          | 1.25 (0.96 – 1.63)           | 0.0971                          | 1.12 (0.90 – 1.41)           | 0.3112                          |
| PC aa C36:6                                                                    | 1.18 (0.97 – 1.43)           | 0.1080                          | 1.15 (0.86 – 1.54)           | 0.3340                          | 1.19 (0.91 – 1.56)           | 0.1955                          |
| PC aa C38:0                                                                    | 1.18 (0.91 – 1.53)           | 0.2124                          | 1.39 (0.93 – 2.07)           | 0.1089                          | 1.05 (0.74 – 1.47)           | 0.7960                          |
| PC aa C38:3                                                                    | 1.01 (0.72 – 1.41)           | 0.9552                          | 1.05 (0.63 – 1.77)           | 0.8432                          | 0.98 (0.63 – 1.52)           | 0.9258                          |
| PC aa C38:4                                                                    | 1.26 (0.93 – 1.72)           | 0.1394                          | 1.22 (0.75 – 1.99)           | 0.4203                          | 1.29 (0.87 – 1.93)           | 0.2109                          |
| PC aa C38:5                                                                    | 1.33 (1.00 – 1.78)           | 0.0494*                         | 1.35 (0.87 – 2.08)           | 0.1761                          | 1.32 (0.90 – 1.94)           | 0.1535                          |
| PC aa C38:6                                                                    | 1.13 (0.88 – 1.45)           | 0.3399                          | 1.13 (0.77 – 1.66)           | 0.5420                          | 1.13 (0.82 – 1.57)           | 0.4628                          |
| PC aa C40:1                                                                    | 1.01 (0.76 – 1.35)           | 0.9344                          | 1.29 (0.82 – 2.03)           | 0.2792                          | 0.86 (0.58 – 1.25)           | 0.4228                          |
| PC aa C40:3                                                                    | 1.34 (0.99 – 1.82)           | 0.0572                          | 1.53 (0.96 – 2.46)           | 0.0760                          | 1.22 (0.82 – 1.82)           | 0.3264                          |
| PC aa C40:4                                                                    | 1.01 (0.79 – 1.31)           | 0.9135                          | 1.03 (0.69 – 1.52)           | 0.9037                          | 1.01 (0.72 – 1.41)           | 0.9685                          |
| PC aa C40:5                                                                    | 1.14 (0.87 – 1.50)           | 0.3300                          | 1.00 (0.66 – 1.52)           | 0.9954                          | 1.26 (0.88 – 1.80)           | 0.2037                          |
| PC aa C40:6                                                                    | 1.05 (0.83 – 1.33)           | 0.6909                          | 0.97 (0.67 – 1.39)           | 0.8631                          | 1.11 (0.82 – 1.51)           | 0.5048                          |
| PC aa C42:0                                                                    | 1.15 (0.89 – 1.48)           | 0.2928                          | 1.38 (0.92 – 2.06)           | 0.1206                          | 1.01 (0.73 – 1.41)           | 0.9423                          |
| PC aa C42:1                                                                    | 0.97 (0.75 – 1.24)           | 0.7885                          | 1.09 (0.76 – 1.57)           | 0.6389                          | 0.87 (0.62 – 1.22)           | 0.4198                          |
| PC aa C42:4                                                                    | 1.29 (1.00 – 1.68)           | 0.0546                          | 1.34 (0.92 – 1.97)           | 0.1305                          | 1.25 (0.87 – 1.79)           | 0.2254                          |
| PC aa C42:5                                                                    | 1.17 (0.90 – 1.52)           | 0.2487                          | 1.32 (0.89 – 1.96)           | 0.1690                          | 1.06 (0.75 – 1.50)           | 0.7511                          |

**Additional file 3: (Continued)**

| Metabolite  | 40-60 years <sup>a</sup>     |                                 | 40-50 years <sup>a</sup>     |                                 | 60 years <sup>a</sup>        |                                 |
|-------------|------------------------------|---------------------------------|------------------------------|---------------------------------|------------------------------|---------------------------------|
|             | OR <sub>crude</sub> (95% CI) | P <sub>crude</sub> <sup>b</sup> | OR <sub>crude</sub> (95% CI) | P <sub>crude</sub> <sup>b</sup> | OR <sub>crude</sub> (95% CI) | P <sub>crude</sub> <sup>b</sup> |
| PC ae C30:2 | 0.98 (0.78 – 1.22)           | 0.8409                          | 0.91 (0.65 – 1.28)           | 0.5746                          | 1.04 (0.77 – 1.40)           | 0.8198                          |
| PC ae C34:0 | 1.13 (0.86 – 1.48)           | 0.3797                          | 0.89 (0.58 – 1.37)           | 0.6025                          | 1.33 (0.93 – 1.89)           | 0.1183                          |
| PC ae C34:1 | 1.11 (0.78 – 1.57)           | 0.5552                          | 0.92 (0.53 – 1.58)           | 0.7487                          | 1.27 (0.81 – 1.99)           | 0.3038                          |
| PC ae C34:2 | 1.05 (0.79 – 1.40)           | 0.7440                          | 0.98 (0.64 – 1.50)           | 0.9201                          | 1.11 (0.76 – 1.63)           | 0.5959                          |
| PC ae C34:3 | 1.20 (0.94 – 1.54)           | 0.1475                          | 1.19 (0.81 – 1.74)           | 0.3803                          | 1.22 (0.87 – 1.69)           | 0.2477                          |
| PC ae C36:1 | 1.21 (0.88 – 1.66)           | 0.2353                          | 0.91 (0.56 – 1.50)           | 0.7218                          | 1.48 (0.97 – 2.24)           | 0.0664                          |
| PC ae C36:2 | 1.38 (0.98 – 1.93)           | 0.0645                          | 1.00 (0.59 – 1.69)           | 0.9879                          | 1.72 (1.10 – 2.68)           | 0.0167*                         |
| PC ae C36:3 | 1.16 (0.84 – 1.61)           | 0.3622                          | 1.23 (0.75 – 2.01)           | 0.4179                          | 1.12 (0.73 – 1.72)           | 0.6150                          |
| PC ae C36:4 | 1.18 (0.88 – 1.59)           | 0.2730                          | 1.25 (0.81 – 1.94)           | 0.3153                          | 1.12 (0.75 – 1.68)           | 0.5701                          |
| PC ae C36:5 | 1.30 (1.00 – 1.68)           | 0.0478*                         | 1.27 (0.86 – 1.86)           | 0.2306                          | 1.32 (0.94 – 1.87)           | 0.1134                          |
| PC ae C38:0 | 1.24 (0.97 – 1.59)           | 0.0925                          | 1.30 (0.88 – 1.93)           | 0.1861                          | 1.20 (0.87 – 1.65)           | 0.2753                          |
| PC ae C38:1 | 1.02 (0.95 – 1.10)           | 0.6020                          | 1.02 (0.92 – 1.14)           | 0.7033                          | 1.02 (0.92 – 1.13)           | 0.7200                          |
| PC ae C38:2 | 1.16 (0.89 – 1.50)           | 0.2741                          | 1.20 (0.80 – 1.79)           | 0.3718                          | 1.13 (0.80 – 1.60)           | 0.5002                          |
| PC ae C38:3 | 1.35 (0.97 – 1.87)           | 0.0765                          | 1.18 (0.72 – 1.94)           | 0.5125                          | 1.49 (0.96 – 2.30)           | 0.0759                          |
| PC ae C38:4 | 1.47 (1.04 – 2.07)           | 0.0303*                         | 1.41 (0.82 – 2.41)           | 0.2117                          | 1.51 (0.96 – 2.37)           | 0.0752                          |
| PC ae C38:5 | 1.29 (0.91 – 1.82)           | 0.1521                          | 1.43 (0.85 – 2.39)           | 0.1744                          | 1.18 (0.74 – 1.88)           | 0.4853                          |
| PC ae C38:6 | 1.21 (0.93 – 1.58)           | 0.1640                          | 1.29 (0.87 – 1.91)           | 0.2127                          | 1.15 (0.80 – 1.66)           | 0.4599                          |
| PC ae C40:0 | 1.19 (0.89 – 1.58)           | 0.2392                          | 1.19 (0.76 – 1.85)           | 0.4451                          | 1.19 (0.82 – 1.73)           | 0.3704                          |
| PC ae C40:1 | 1.44 (1.06 – 1.96)           | 0.0189*                         | 1.29 (0.80 – 2.08)           | 0.2917                          | 1.56 (1.04 – 2.32)           | 0.0298*                         |
| PC ae C40:2 | 1.33 (0.98 – 1.81)           | 0.0676                          | 1.14 (0.71 – 1.83)           | 0.5827                          | 1.49 (0.99 – 2.23)           | 0.0539                          |
| PC ae C40:3 | 1.17 (0.86 – 1.59)           | 0.3163                          | 1.12 (0.73 – 1.73)           | 0.5971                          | 1.22 (0.79 – 1.90)           | 0.3726                          |
| PC ae C40:5 | 1.44 (1.01 – 2.05)           | 0.0425*                         | 1.73 (1.03 – 2.90)           | 0.0385*                         | 1.22 (0.75 – 1.99)           | 0.4213                          |
| PC ae C40:6 | 1.33 (0.99 – 1.79)           | 0.0583                          | 1.23 (0.78 – 1.93)           | 0.3721                          | 1.42 (0.96 – 2.11)           | 0.0831                          |
| PC ae C42:1 | 1.08 (0.80 – 1.46)           | 0.6146                          | 1.08 (0.67 – 1.72)           | 0.7588                          | 1.08 (0.73 – 1.61)           | 0.6894                          |
| PC ae C42:2 | 1.35 (0.99 – 1.86)           | 0.0595                          | 1.35 (0.83 – 2.21)           | 0.2281                          | 1.36 (0.90 – 2.05)           | 0.1476                          |
| PC ae C42:3 | 1.32 (0.95 – 1.84)           | 0.0965                          | 1.32 (0.78 – 2.21)           | 0.2994                          | 1.32 (0.87 – 2.02)           | 0.1940                          |
| PC ae C42:4 | 1.35 (0.99 – 1.84)           | 0.0580                          | 1.37 (0.87 – 2.15)           | 0.1719                          | 1.33 (0.87 – 2.03)           | 0.1879                          |
| PC ae C42:5 | 1.20 (0.84 – 1.69)           | 0.3153                          | 1.47 (0.87 – 2.46)           | 0.1479                          | 1.01 (0.63 – 1.62)           | 0.9769                          |
| PC ae C44:3 | 0.99 (0.79 – 1.25)           | 0.9517                          | 1.05 (0.74 – 1.49)           | 0.7823                          | 0.95 (0.69 – 1.30)           | 0.7432                          |
| PC ae C44:4 | 1.10 (0.82 – 1.47)           | 0.5168                          | 1.09 (0.71 – 1.68)           | 0.6993                          | 1.11 (0.75 – 1.63)           | 0.6003                          |
| PC ae C44:5 | 1.00 (0.75 – 1.32)           | 0.9731                          | 1.04 (0.67 – 1.62)           | 0.8594                          | 0.96 (0.66 – 1.40)           | 0.8471                          |
| PC ae C44:6 | 1.03 (0.77 – 1.37)           | 0.8481                          | 1.09 (0.71 – 1.66)           | 0.7091                          | 0.99 (0.68 – 1.44)           | 0.9404                          |
| LPC C16:0   | 1.50 (1.09 – 2.07)           | 0.0122*                         | 1.36 (0.83 – 2.22)           | 0.2252                          | 1.62 (1.06 – 2.45)           | 0.0243*                         |
| LPC C16:1   | 1.08 (0.84 – 1.38)           | 0.5675                          | 0.91 (0.63 – 1.32)           | 0.6318                          | 1.23 (0.88 – 1.73)           | 0.2244                          |
| LPC C17:0   | 1.59 (1.21 – 2.08)           | 0.0007*                         | 1.10 (0.73 – 1.66)           | 0.6567                          | 2.08 (1.45 – 2.98)           | <0.0001*                        |
| LPC C18:0   | 1.59 (1.17 – 2.18)           | 0.0034*                         | 1.31 (0.81 – 2.12)           | 0.2791                          | 1.83 (1.22 – 2.75)           | 0.0037*                         |
| LPC C18:1   | 1.39 (1.04 – 1.87)           | 0.0270*                         | 1.22 (0.78 – 1.90)           | 0.3924                          | 1.54 (1.05 – 2.28)           | 0.0293*                         |
| LPC C18:2   | 1.19 (0.94 – 1.50)           | 0.1486                          | 1.05 (0.74 – 1.50)           | 0.7705                          | 1.31 (0.96 – 1.80)           | 0.0943                          |
| LPC C20:3   | 1.30 (0.99 – 1.70)           | 0.0587                          | 1.18 (0.77 – 1.82)           | 0.4484                          | 1.38 (0.97 – 1.95)           | 0.0699                          |
| LPC C20:4   | 1.43 (1.09 – 1.86)           | 0.0085*                         | 1.25 (0.83 – 1.86)           | 0.2854                          | 1.58 (1.11 – 2.24)           | 0.0109*                         |
| LPC C24:0   | 0.92 (0.77 – 1.10)           | 0.3511                          | 0.94 (0.70 – 1.27)           | 0.7031                          | 0.90 (0.72 – 1.13)           | 0.3766                          |
| SM-OH C14:1 | 1.11 (0.82 – 1.50)           | 0.5039                          | 0.99 (0.62 – 1.58)           | 0.9669                          | 1.21 (0.81 – 1.80)           | 0.3585                          |
| SM-OH C16:1 | 1.12 (0.82 – 1.51)           | 0.4835                          | 0.97 (0.60 – 1.56)           | 0.8842                          | 1.23 (0.83 – 1.83)           | 0.3046                          |
| SM-OH C22:1 | 1.19 (0.88 – 1.62)           | 0.2639                          | 1.16 (0.73 – 1.84)           | 0.5203                          | 1.22 (0.80 – 1.84)           | 0.3543                          |
| SM C16:0    | 1.16 (0.81 – 1.67)           | 0.4180                          | 1.39 (0.79 – 2.46)           | 0.2568                          | 1.03 (0.64 – 1.65)           | 0.9164                          |
| SM C16:1    | 1.16 (0.80 – 1.68)           | 0.4436                          | 1.21 (0.66 – 2.22)           | 0.5423                          | 1.13 (0.70 – 1.81)           | 0.6196                          |
| SM C18:0    | 1.04 (0.74 – 1.47)           | 0.8054                          | 1.03 (0.60 – 1.75)           | 0.9226                          | 1.06 (0.68 – 1.65)           | 0.8107                          |
| SM C18:1    | 1.05 (0.76 – 1.45)           | 0.7773                          | 1.10 (0.65 – 1.85)           | 0.7314                          | 1.02 (0.67 – 1.55)           | 0.9299                          |
| SM C24:1    | 1.23 (0.87 – 1.74)           | 0.2347                          | 1.55 (0.91 – 2.65)           | 0.1062                          | 1.04 (0.66 – 1.64)           | 0.8633                          |
| HI          | 1.45 (0.90 – 2.33)           | 0.1255                          | 1.47 (0.71 – 3.05)           | 0.3026                          | 1.44 (0.77 – 2.69)           | 0.2568                          |

**Additional file 3: (Continued)**

| Metabolite                                                                        | 40-60 years <sup>a</sup>     |                                 | 40-50 years <sup>a</sup>     |                                 | 60 years <sup>a</sup>        |                                 |
|-----------------------------------------------------------------------------------|------------------------------|---------------------------------|------------------------------|---------------------------------|------------------------------|---------------------------------|
|                                                                                   | OR <sub>crude</sub> (95% CI) | p <sub>crude</sub> <sup>b</sup> | OR <sub>crude</sub> (95% CI) | p <sub>crude</sub> <sup>b</sup> | OR <sub>crude</sub> (95% CI) | p <sub>crude</sub> <sup>b</sup> |
| <b>Metabolites measured with NMR and overall prostate cancer risk<sup>a</sup></b> |                              |                                 |                              |                                 |                              |                                 |
| 2-Aminobutyrate                                                                   | 0.82 (0.60 – 1.11)           | 0.2014                          | 0.75 (0.47 – 1.18)           | 0.2119                          | 0.88 (0.58 – 1.34)           | 0.5560                          |
| 2-Hydroxybutyrate                                                                 | 0.94 (0.75 – 1.17)           | 0.5695                          | 0.87 (0.63 – 1.22)           | 0.4290                          | 0.99 (0.73 – 1.34)           | 0.9610                          |
| 2-Hydroxyisovalerate                                                              | 0.98 (0.80 – 1.20)           | 0.8564                          | 1.01 (0.75 – 1.37)           | 0.9439                          | 0.96 (0.73 – 1.26)           | 0.7596                          |
| 2-Ketoglutarate                                                                   | 0.87 (0.55 – 1.39)           | 0.5650                          | 0.63 (0.33 – 1.24)           | 0.1823                          | 1.19 (0.62 – 2.29)           | 0.6077                          |
| 2-Oxoisocaproate                                                                  | 0.84 (0.61 – 1.14)           | 0.2606                          | 0.80 (0.52 – 1.24)           | 0.3237                          | 0.87 (0.56 – 1.36)           | 0.5465                          |
| 3-Hydroxybutyrate                                                                 | 1.00 (0.92 – 1.10)           | 0.9465                          | 1.03 (0.90 – 1.18)           | 0.6712                          | 0.98 (0.87 – 1.11)           | 0.7676                          |
| 3-Hydroxyisovalerate                                                              | 0.79 (0.56 – 1.11)           | 0.1652                          | 0.81 (0.48 – 1.37)           | 0.4336                          | 0.77 (0.49 – 1.20)           | 0.2476                          |
| Acetate                                                                           | 1.09 (0.92 – 1.28)           | 0.3203                          | 1.14 (0.91 – 1.43)           | 0.2669                          | 1.03 (0.81 – 1.32)           | 0.7832                          |
| Acetoacetate                                                                      | 0.95 (0.88 – 1.04)           | 0.2576                          | 0.98 (0.87 – 1.12)           | 0.7983                          | 0.93 (0.84 – 1.04)           | 0.2052                          |
| Acetylcarnitine                                                                   | 1.08 (0.84 – 1.40)           | 0.5408                          | 1.10 (0.75 – 1.62)           | 0.6152                          | 1.07 (0.76 – 1.50)           | 0.7102                          |
| Alanine                                                                           | 0.86 (0.63 – 1.19)           | 0.3608                          | 0.82 (0.51 – 1.31)           | 0.4023                          | 0.90 (0.59 – 1.39)           | 0.6365                          |
| Arginine                                                                          | 0.85 (0.50 – 1.45)           | 0.5547                          | 0.70 (0.33 – 1.50)           | 0.3586                          | 1.03 (0.49 – 2.14)           | 0.9447                          |
| Asparagine                                                                        | 0.89 (0.53 – 1.49)           | 0.6458                          | 1.24 (0.57 – 2.68)           | 0.5862                          | 0.67 (0.33 – 1.36)           | 0.2636                          |
| Betaine                                                                           | 1.08 (0.65 – 1.80)           | 0.7658                          | 0.65 (0.30 – 1.41)           | 0.2753                          | 1.61 (0.81 – 3.20)           | 0.1724                          |
| Carnitine                                                                         | 0.99 (0.67 – 1.47)           | 0.9774                          | 1.18 (0.63 – 2.22)           | 0.6051                          | 0.89 (0.54 – 1.47)           | 0.6529                          |
| Choline                                                                           | 1.21 (0.79 – 1.85)           | 0.3886                          | 0.88 (0.47 – 1.64)           | 0.6792                          | 1.60 (0.89 – 2.87)           | 0.1177                          |
| Citrate                                                                           | 1.35 (0.95 – 1.91)           | 0.0914                          | 1.54 (0.92 – 2.57)           | 0.1010                          | 1.21 (0.75 – 1.93)           | 0.4372                          |
| Creatine                                                                          | 0.89 (0.77 – 1.04)           | 0.1468                          | 0.88 (0.69 – 1.13)           | 0.3228                          | 0.90 (0.74 – 1.09)           | 0.2853                          |
| Creatinine                                                                        | 1.10 (0.69 – 1.73)           | 0.6925                          | 1.30 (0.59 – 2.83)           | 0.5172                          | 1.01 (0.57 – 1.77)           | 0.9850                          |
| Dimethylglycine                                                                   | 1.10 (0.83 – 1.46)           | 0.4932                          | 1.00 (0.64 – 1.57)           | 0.9909                          | 1.18 (0.82 – 1.70)           | 0.3823                          |
| Dimethylsulfone                                                                   | 1.07 (0.88 – 1.30)           | 0.4904                          | 1.32 (0.98 – 1.79)           | 0.0701                          | 0.92 (0.71 – 1.19)           | 0.5172                          |
| Formate                                                                           | 1.25 (0.83 – 1.88)           | 0.2831                          | 0.97 (0.53 – 1.77)           | 0.9168                          | 1.53 (0.88 – 2.66)           | 0.1291                          |
| Glucose                                                                           | 1.18 (0.69 – 2.02)           | 0.5375                          | 1.05 (0.44 – 2.47)           | 0.9179                          | 1.28 (0.65 – 2.53)           | 0.4799                          |
| Glutamate                                                                         | 0.97 (0.80 – 1.17)           | 0.7524                          | 0.91 (0.69 – 1.20)           | 0.4898                          | 1.03 (0.79 – 1.34)           | 0.8231                          |
| Glutamine                                                                         | 0.64 (0.37 – 1.12)           | 0.1154                          | 0.97 (0.47 – 2.01)           | 0.9259                          | 0.41 (0.18 – 0.90)           | 0.0267*                         |
| Glycine                                                                           | 1.17 (0.81 – 1.69)           | 0.3943                          | 2.11 (1.21 – 3.69)           | 0.0084*                         | 0.68 (0.41 – 1.14)           | 0.1472                          |
| Histidine                                                                         | 0.59 (0.32 – 1.08)           | 0.0884                          | 1.08 (0.45 – 2.63)           | 0.8599                          | 0.35 (0.15 – 0.81)           | 0.0136*                         |
| Isocaproate                                                                       | 1.81 (0.57 – 5.74)           | 0.3139                          | 1.30 (0.24 – 7.14)           | 0.7608                          | 2.39 (0.50 – 11.4)           | 0.2770                          |
| Isoleucine                                                                        | 0.95 (0.62 – 1.47)           | 0.8314                          | 0.86 (0.46 – 1.64)           | 0.6551                          | 1.04 (0.58 – 1.85)           | 0.9058                          |
| Lactate                                                                           | 0.96 (0.78 – 1.20)           | 0.7290                          | 0.97 (0.72 – 1.32)           | 0.8488                          | 0.95 (0.70 – 1.30)           | 0.7643                          |
| Leucine                                                                           | 0.92 (0.57 – 1.49)           | 0.7330                          | 0.96 (0.47 – 1.97)           | 0.9062                          | 0.89 (0.46 – 1.72)           | 0.7231                          |
| Lysine                                                                            | 0.70 (0.43 – 1.13)           | 0.1454                          | 0.70 (0.34 – 1.44)           | 0.3325                          | 0.70 (0.37 – 1.34)           | 0.2772                          |
| Methionine                                                                        | 0.66 (0.38 – 1.13)           | 0.1289                          | 0.71 (0.32 – 1.61)           | 0.4138                          | 0.62 (0.30 – 1.28)           | 0.1918                          |
| Myo-inositol                                                                      | 1.08 (0.76 – 1.54)           | 0.6535                          | 1.21 (0.69 – 2.10)           | 0.5083                          | 1.01 (0.64 – 1.59)           | 0.9711                          |
| O-phosphocholine                                                                  | 0.81 (0.64 – 1.01)           | 0.0660                          | 0.81 (0.58 – 1.13)           | 0.2120                          | 0.80 (0.58 – 1.11)           | 0.1766                          |
| Ornithine                                                                         | 0.89 (0.64 – 1.24)           | 0.4971                          | 1.34 (0.81 – 2.20)           | 0.2554                          | 0.64 (0.41 – 1.01)           | 0.0542                          |
| Phenylalanine                                                                     | 0.70 (0.40 – 1.23)           | 0.2151                          | 0.90 (0.37 – 2.15)           | 0.8073                          | 0.58 (0.28 – 1.23)           | 0.1567                          |
| Proline                                                                           | 0.87 (0.64 – 1.19)           | 0.3778                          | 0.95 (0.60 – 1.52)           | 0.8432                          | 0.81 (0.53 – 1.22)           | 0.3154                          |
| Pyruvate                                                                          | 0.79 (0.65 – 0.96)           | 0.0185*                         | 0.65 (0.48 – 0.89)           | 0.0066*                         | 0.94 (0.71 – 1.24)           | 0.6512                          |
| Serine                                                                            | 0.84 (0.56 – 1.24)           | 0.3678                          | 1.13 (0.63 – 2.03)           | 0.6744                          | 0.65 (0.38 – 1.10)           | 0.1104                          |
| Threonine                                                                         | 0.84 (0.53 – 1.33)           | 0.4495                          | 1.04 (0.51 – 2.09)           | 0.9223                          | 0.71 (0.38 – 1.32)           | 0.2747                          |
| Trimethylamine                                                                    | 1.01 (0.82 – 1.25)           | 0.8986                          | 1.17 (0.85 – 1.61)           | 0.3416                          | 0.92 (0.70 – 1.20)           | 0.5219                          |
| Trimethylamine-N-oxide                                                            | 1.01 (0.82 – 1.26)           | 0.8998                          | 0.99 (0.75 – 1.33)           | 0.9661                          | 1.04 (0.75 – 1.44)           | 0.8130                          |
| Tyrosine                                                                          | 0.74 (0.48 – 1.14)           | 0.1720                          | 0.81 (0.41 – 1.59)           | 0.5405                          | 0.69 (0.39 – 1.22)           | 0.2045                          |
| Valine                                                                            | 0.90 (0.54 – 1.50)           | 0.6819                          | 0.90 (0.42 – 1.92)           | 0.7919                          | 0.90 (0.45 – 1.79)           | 0.7534                          |

**Additional file 3: (Continued)**

| Metabolite                                                                            | 40-60 years <sup>a</sup>     |                                 | 40-50 years <sup>a</sup>     |                                 | 60 years <sup>a</sup>        |                                 |
|---------------------------------------------------------------------------------------|------------------------------|---------------------------------|------------------------------|---------------------------------|------------------------------|---------------------------------|
|                                                                                       | OR <sub>crude</sub> (95% CI) | p <sub>crude</sub> <sup>b</sup> | OR <sub>crude</sub> (95% CI) | p <sub>crude</sub> <sup>b</sup> | OR <sub>crude</sub> (95% CI) | p <sub>crude</sub> <sup>b</sup> |
| <b>Metabolites measured by MS and non-aggressive prostate cancer risk<sup>a</sup></b> |                              |                                 |                              |                                 |                              |                                 |
| C0                                                                                    | 1.24 (0.83 – 1.85)           | 0.2934                          | 1.20 (0.66 – 2.16)           | 0.5494                          | 1.28 (0.74 – 2.21)           | 0.3792                          |
| C2                                                                                    | 1.13 (0.88 – 1.44)           | 0.3324                          | 1.02 (0.71 – 1.46)           | 0.9232                          | 1.24 (0.88 – 1.73)           | 0.2177                          |
| C3                                                                                    | 1.27 (0.96 – 1.69)           | 0.0900                          | 1.01 (0.67 – 1.52)           | 0.9646                          | 1.57 (1.06 – 2.33)           | 0.0231*                         |
| C4                                                                                    | 0.92 (0.74 – 1.15)           | 0.4662                          | 0.78 (0.56 – 1.09)           | 0.1491                          | 1.06 (0.78 – 1.43)           | 0.7266                          |
| C5                                                                                    | 1.09 (0.80 – 1.48)           | 0.5953                          | 0.96 (0.60 – 1.53)           | 0.8690                          | 1.19 (0.79 – 1.80)           | 0.3951                          |
| C10                                                                                   | 1.07 (0.87 – 1.32)           | 0.5264                          | 0.99 (0.73 – 1.34)           | 0.9313                          | 1.15 (0.86 – 1.53)           | 0.3460                          |
| C16                                                                                   | 1.09 (0.76 – 1.57)           | 0.6325                          | 1.09 (0.64 – 1.86)           | 0.7469                          | 1.09 (0.67 – 1.80)           | 0.7241                          |
| C18:1                                                                                 | 1.00 (0.73 – 1.37)           | 0.9900                          | 1.11 (0.72 – 1.72)           | 0.6310                          | 0.90 (0.57 – 1.41)           | 0.6301                          |
| C18:2                                                                                 | 1.01 (0.78 – 1.32)           | 0.9197                          | 0.98 (0.67 – 1.42)           | 0.8991                          | 1.05 (0.72 – 1.54)           | 0.7874                          |
| Ala                                                                                   | 0.93 (0.68 – 1.28)           | 0.6558                          | 0.99 (0.63 – 1.56)           | 0.9652                          | 0.88 (0.56 – 1.37)           | 0.5606                          |
| Arg                                                                                   | 0.73 (0.54 – 1.00)           | 0.0494*                         | 0.61 (0.39 – 0.96)           | 0.0306*                         | 0.87 (0.57 – 1.34)           | 0.5321                          |
| His                                                                                   | 0.78 (0.47 – 1.31)           | 0.3487                          | 1.07 (0.54 – 2.13)           | 0.8565                          | 0.53 (0.25 – 1.15)           | 0.1105                          |
| Ile                                                                                   | 0.97 (0.63 – 1.50)           | 0.8826                          | 0.89 (0.48 – 1.63)           | 0.6990                          | 1.06 (0.57 – 1.98)           | 0.8529                          |
| Leu                                                                                   | 1.00 (0.64 – 1.57)           | 0.9930                          | 1.01 (0.51 – 1.97)           | 0.9839                          | 1.00 (0.54 – 1.83)           | 0.9949                          |
| Lys                                                                                   | 0.76 (0.51 – 1.13)           | 0.1719                          | 0.90 (0.50 – 1.62)           | 0.7264                          | 0.65 (0.37 – 1.13)           | 0.1233                          |
| Orn                                                                                   | 0.99 (0.72 – 1.35)           | 0.9329                          | 1.41 (0.88 – 2.25)           | 0.1503                          | 0.73 (0.47 – 1.12)           | 0.1503                          |
| Phe                                                                                   | 0.99 (0.59 – 1.65)           | 0.9621                          | 0.94 (0.45 – 1.98)           | 0.8743                          | 1.03 (0.51 – 2.09)           | 0.9319                          |
| Pro                                                                                   | 1.09 (0.79 – 1.51)           | 0.6019                          | 1.23 (0.76 – 2.00)           | 0.3964                          | 0.99 (0.64 – 1.52)           | 0.9510                          |
| Trp                                                                                   | 1.18 (0.79 – 1.75)           | 0.4268                          | 1.13 (0.64 – 2.01)           | 0.6647                          | 1.21 (0.70 – 2.11)           | 0.4924                          |
| Tyr                                                                                   | 0.95 (0.65 – 1.38)           | 0.7768                          | 0.84 (0.49 – 1.44)           | 0.5266                          | 1.06 (0.63 – 1.80)           | 0.8212                          |
| Creatinine                                                                            | 1.35 (0.77 – 2.37)           | 0.2944                          | 1.36 (0.57 – 3.23)           | 0.4882                          | 1.34 (0.64 – 2.81)           | 0.4318                          |
| Spermidine                                                                            | 0.99 (0.84 – 1.17)           | 0.9118                          | 0.92 (0.72 – 1.16)           | 0.4676                          | 1.08 (0.84 – 1.38)           | 0.5551                          |
| Taurine                                                                               | 1.20 (0.85 – 1.71)           | 0.2969                          | 0.89 (0.52 – 1.50)           | 0.6514                          | 1.53 (0.96 – 2.46)           | 0.0760                          |
| PC aa C28:1                                                                           | 0.94 (0.67 – 1.32)           | 0.7120                          | 0.86 (0.54 – 1.39)           | 0.5451                          | 1.03 (0.62 – 1.69)           | 0.9174                          |
| PC aa C30:0                                                                           | 1.03 (0.79 – 1.33)           | 0.8523                          | 1.06 (0.73 – 1.54)           | 0.7716                          | 1.00 (0.69 – 1.43)           | 0.9835                          |
| PC aa C32:0                                                                           | 1.09 (0.74 – 1.61)           | 0.6625                          | 1.06 (0.6 – 1.90)            | 0.8328                          | 1.11 (0.66 – 1.88)           | 0.6912                          |
| PC aa C32:1                                                                           | 0.91 (0.75 – 1.09)           | 0.3011                          | 0.89 (0.68 – 1.16)           | 0.3911                          | 0.92 (0.71 – 1.20)           | 0.5452                          |
| PC aa C32:2                                                                           | 0.96 (0.79 – 1.16)           | 0.6423                          | 0.94 (0.72 – 1.22)           | 0.6244                          | 0.98 (0.74 – 1.30)           | 0.8751                          |
| PC aa C34:1                                                                           | 1.07 (0.74 – 1.56)           | 0.7178                          | 0.99 (0.56 – 1.74)           | 0.9720                          | 1.14 (0.69 – 1.89)           | 0.6057                          |
| PC aa C34:2                                                                           | 1.23 (0.83 – 1.83)           | 0.2959                          | 1.09 (0.61 – 1.96)           | 0.7761                          | 1.36 (0.80 – 2.32)           | 0.2502                          |
| PC aa C34:3                                                                           | 1.07 (0.79 – 1.46)           | 0.6548                          | 0.99 (0.64 – 1.54)           | 0.9695                          | 1.16 (0.75 – 1.78)           | 0.5078                          |
| PC aa C34:4                                                                           | 1.11 (0.87 – 1.42)           | 0.3993                          | 1.02 (0.73 – 1.43)           | 0.9052                          | 1.23 (0.85 – 1.77)           | 0.2678                          |
| PC aa C36:0                                                                           | 1.20 (0.95 – 1.52)           | 0.1264                          | 1.17 (0.84 – 1.65)           | 0.3563                          | 1.23 (0.89 – 1.70)           | 0.2177                          |
| PC aa C36:1                                                                           | 1.02 (0.72 – 1.46)           | 0.8939                          | 0.93 (0.54 – 1.59)           | 0.7851                          | 1.10 (0.69 – 1.75)           | 0.6824                          |
| PC aa C36:2                                                                           | 1.13 (0.75 – 1.71)           | 0.5612                          | 0.99 (0.53 – 1.86)           | 0.9727                          | 1.25 (0.72 – 2.17)           | 0.4253                          |
| PC aa C36:3                                                                           | 1.09 (0.73 – 1.62)           | 0.6752                          | 0.97 (0.54 – 1.76)           | 0.9295                          | 1.19 (0.70 – 2.04)           | 0.5205                          |
| PC aa C36:4                                                                           | 1.34 (0.92 – 1.95)           | 0.1250                          | 1.31 (0.74 – 2.34)           | 0.3536                          | 1.36 (0.83 – 2.24)           | 0.2205                          |
| PC aa C36:5                                                                           | 1.19 (0.98 – 1.45)           | 0.0780                          | 1.24 (0.94 – 1.65)           | 0.1341                          | 1.15 (0.88 – 1.50)           | 0.3132                          |
| PC aa C36:6                                                                           | 1.19 (0.96 – 1.49)           | 0.1204                          | 1.11 (0.81 – 1.51)           | 0.5232                          | 1.28 (0.94 – 1.76)           | 0.1200                          |
| PC aa C38:0                                                                           | 1.33 (0.99 – 1.78)           | 0.0547                          | 1.36 (0.88 – 2.09)           | 0.1630                          | 1.31 (0.88 – 1.94)           | 0.1847                          |
| PC aa C38:3                                                                           | 0.94 (0.65 – 1.36)           | 0.7406                          | 0.98 (0.56 – 1.73)           | 0.9470                          | 0.91 (0.56 – 1.49)           | 0.7031                          |
| PC aa C38:4                                                                           | 1.21 (0.85 – 1.72)           | 0.2799                          | 1.24 (0.73 – 2.13)           | 0.4282                          | 1.19 (0.75 – 1.89)           | 0.4579                          |
| PC aa C38:5                                                                           | 1.28 (0.93 – 1.78)           | 0.1336                          | 1.23 (0.77 – 1.96)           | 0.3916                          | 1.34 (0.85 – 2.10)           | 0.2085                          |
| PC aa C38:6                                                                           | 1.20 (0.90 – 1.59)           | 0.2139                          | 1.05 (0.69 – 1.61)           | 0.8172                          | 1.32 (0.91 – 1.94)           | 0.1468                          |
| PC aa C40:1                                                                           | 1.09 (0.79 – 1.50)           | 0.6030                          | 1.35 (0.82 – 2.21)           | 0.2337                          | 0.93 (0.60 – 1.42)           | 0.7250                          |
| PC aa C40:3                                                                           | 1.42 (1.00 – 2.00)           | 0.0486*                         | 1.50 (0.91 – 2.48)           | 0.1141                          | 1.35 (0.83 – 2.17)           | 0.2247                          |
| PC aa C40:4                                                                           | 0.86 (0.65 – 1.16)           | 0.3240                          | 0.90 (0.59 – 1.38)           | 0.6263                          | 0.84 (0.56 – 1.24)           | 0.3719                          |
| PC aa C40:5                                                                           | 1.08 (0.80 – 1.47)           | 0.6173                          | 0.90 (0.57 – 1.41)           | 0.6372                          | 1.27 (0.84 – 1.93)           | 0.2652                          |
| PC aa C40:6                                                                           | 1.08 (0.82 – 1.40)           | 0.5958                          | 0.89 (0.60 – 1.32)           | 0.5664                          | 1.26 (0.88 – 1.80)           | 0.2178                          |
| PC aa C42:0                                                                           | 1.21 (0.91 – 1.61)           | 0.1900                          | 1.31 (0.86 – 2.02)           | 0.2141                          | 1.13 (0.77 – 1.66)           | 0.5197                          |
| PC aa C42:1                                                                           | 1.01 (0.77 – 1.33)           | 0.9271                          | 1.05 (0.71 – 1.55)           | 0.8005                          | 0.98 (0.66 – 1.44)           | 0.9012                          |
| PC aa C42:4                                                                           | 1.29 (0.96 – 1.73)           | 0.0878                          | 1.41 (0.93 – 2.15)           | 0.1079                          | 1.18 (0.78 – 1.79)           | 0.4227                          |
| PC aa C42:5                                                                           | 1.20 (0.89 – 1.63)           | 0.2254                          | 1.31 (0.85 – 2.01)           | 0.2167                          | 1.11 (0.73 – 1.69)           | 0.6311                          |

**Additional file 3: (Continued)**

| Metabolite  | 40-60 years <sup>a</sup>     |                                 | 40-50 years <sup>a</sup>     |                                 | 60 years <sup>a</sup>        |                                 |
|-------------|------------------------------|---------------------------------|------------------------------|---------------------------------|------------------------------|---------------------------------|
|             | OR <sub>crude</sub> (95% CI) | P <sub>crude</sub> <sup>b</sup> | OR <sub>crude</sub> (95% CI) | P <sub>crude</sub> <sup>b</sup> | OR <sub>crude</sub> (95% CI) | P <sub>crude</sub> <sup>b</sup> |
| PC ae C30:2 | 0.89 (0.69 – 1.15)           | 0.3569                          | 0.85 (0.59 – 1.24)           | 0.4024                          | 0.92 (0.64 – 1.31)           | 0.6362                          |
| PC ae C34:0 | 1.02 (0.75 – 1.39)           | 0.9132                          | 0.83 (0.52 – 1.31)           | 0.4167                          | 1.22 (0.80 – 1.86)           | 0.3677                          |
| PC ae C34:1 | 1.06 (0.72 – 1.57)           | 0.7568                          | 0.90 (0.50 – 1.62)           | 0.7324                          | 1.22 (0.72 – 2.06)           | 0.4680                          |
| PC ae C34:2 | 1.03 (0.75 – 1.42)           | 0.8444                          | 0.97 (0.62 – 1.52)           | 0.8867                          | 1.10 (0.70 – 1.74)           | 0.6748                          |
| PC ae C34:3 | 1.25 (0.95 – 1.66)           | 0.1125                          | 1.23 (0.82 – 1.86)           | 0.3147                          | 1.27 (0.87 – 1.86)           | 0.2180                          |
| PC ae C36:1 | 1.04 (0.73 – 1.49)           | 0.8128                          | 0.85 (0.50 – 1.43)           | 0.5375                          | 1.25 (0.77 – 2.05)           | 0.3661                          |
| PC ae C36:2 | 1.21 (0.82 – 1.78)           | 0.3308                          | 0.89 (0.50 – 1.57)           | 0.6860                          | 1.57 (0.93 – 2.66)           | 0.0930                          |
| PC ae C36:3 | 1.19 (0.83 – 1.72)           | 0.3446                          | 1.23 (0.73 – 2.07)           | 0.4468                          | 1.16 (0.70 – 1.92)           | 0.5613                          |
| PC ae C36:4 | 1.12 (0.80 – 1.57)           | 0.5117                          | 1.23 (0.77 – 1.98)           | 0.3939                          | 1.02 (0.63 – 1.64)           | 0.9430                          |
| PC ae C36:5 | 1.24 (0.93 – 1.66)           | 0.1374                          | 1.23 (0.81 – 1.87)           | 0.3310                          | 1.25 (0.85 – 1.86)           | 0.2605                          |
| PC ae C38:0 | 1.31 (0.99 – 1.73)           | 0.0601                          | 1.29 (0.84 – 1.97)           | 0.2408                          | 1.33 (0.91 – 1.93)           | 0.1411                          |
| PC ae C38:1 | 0.99 (0.91 – 1.07)           | 0.7869                          | 0.99 (0.89 – 1.12)           | 0.9169                          | 0.98 (0.88 – 1.11)           | 0.7800                          |
| PC ae C38:2 | 1.12 (0.84 – 1.51)           | 0.4345                          | 1.16 (0.76 – 1.77)           | 0.5001                          | 1.10 (0.73 – 1.64)           | 0.6624                          |
| PC ae C38:3 | 1.09 (0.76 – 1.57)           | 0.6426                          | 1.03 (0.61 – 1.74)           | 0.9176                          | 1.15 (0.69 – 1.91)           | 0.5864                          |
| PC ae C38:4 | 1.24 (0.84 – 1.83)           | 0.2903                          | 1.33 (0.75 – 2.37)           | 0.3368                          | 1.16 (0.68 – 1.98)           | 0.5794                          |
| PC ae C38:5 | 1.25 (0.85 – 1.84)           | 0.2554                          | 1.36 (0.78 – 2.36)           | 0.2728                          | 1.15 (0.67 – 1.98)           | 0.6074                          |
| PC ae C38:6 | 1.22 (0.90 – 1.66)           | 0.1912                          | 1.19 (0.78 – 1.82)           | 0.4236                          | 1.26 (0.82 – 1.94)           | 0.2935                          |
| PC ae C40:0 | 1.32 (0.95 – 1.84)           | 0.1010                          | 1.07 (0.66 – 1.74)           | 0.7789                          | 1.58 (1.00 – 2.50)           | 0.0489*                         |
| PC ae C40:1 | 1.54 (1.09 – 2.18)           | 0.0157*                         | 1.21 (0.73 – 2.01)           | 0.4687                          | 1.90 (1.17 – 3.09)           | 0.0093*                         |
| PC ae C40:2 | 1.12 (0.80 – 1.59)           | 0.5079                          | 1.04 (0.64 – 1.71)           | 0.8656                          | 1.21 (0.74 – 1.96)           | 0.4462                          |
| PC ae C40:3 | 1.10 (0.79 – 1.55)           | 0.5646                          | 1.10 (0.70 – 1.72)           | 0.6775                          | 1.11 (0.66 – 1.87)           | 0.6892                          |
| PC ae C40:5 | 1.49 (1.00 – 2.21)           | 0.0502                          | 1.73 (0.99 – 3.00)           | 0.0535                          | 1.26 (0.71 – 2.24)           | 0.4294                          |
| PC ae C40:6 | 1.28 (0.91 – 1.79)           | 0.1549                          | 1.04 (0.65 – 1.68)           | 0.8647                          | 1.55 (0.97 – 2.50)           | 0.0693                          |
| PC ae C42:1 | 1.05 (0.75 – 1.48)           | 0.7817                          | 1.01 (0.60 – 1.68)           | 0.9846                          | 1.09 (0.69 – 1.72)           | 0.7231                          |
| PC ae C42:2 | 1.25 (0.87 – 1.78)           | 0.2282                          | 1.13 (0.67 – 1.92)           | 0.6380                          | 1.35 (0.83 – 2.20)           | 0.2283                          |
| PC ae C42:3 | 1.37 (0.94 – 1.99)           | 0.1015                          | 1.22 (0.69 – 2.15)           | 0.4893                          | 1.49 (0.91 – 2.46)           | 0.1165                          |
| PC ae C42:4 | 1.30 (0.92 – 1.82)           | 0.1350                          | 1.29 (0.80 – 2.06)           | 0.2988                          | 1.31 (0.80 – 2.12)           | 0.2822                          |
| PC ae C42:5 | 1.18 (0.81 – 1.73)           | 0.3848                          | 1.47 (0.85 – 2.54)           | 0.1686                          | 0.96 (0.56 – 1.64)           | 0.8842                          |
| PC ae C44:3 | 1.07 (0.82 – 1.38)           | 0.6238                          | 1.07 (0.74 – 1.55)           | 0.7207                          | 1.06 (0.74 – 1.52)           | 0.7364                          |
| PC ae C44:4 | 1.00 (0.72 – 1.38)           | 0.9919                          | 0.95 (0.60 – 1.52)           | 0.8308                          | 1.05 (0.67 – 1.64)           | 0.8476                          |
| PC ae C44:5 | 0.99 (0.72 – 1.36)           | 0.9654                          | 1.06 (0.66 – 1.71)           | 0.7962                          | 0.94 (0.61 – 1.44)           | 0.7693                          |
| PC ae C44:6 | 1.06 (0.78 – 1.45)           | 0.7117                          | 1.03 (0.65 – 1.62)           | 0.9068                          | 1.09 (0.71 – 1.68)           | 0.6899                          |
| LPC C16:0   | 1.39 (0.97 – 1.99)           | 0.0764                          | 1.32 (0.77 – 2.26)           | 0.3073                          | 1.44 (0.89 – 2.34)           | 0.1426                          |
| LPC C16:1   | 0.97 (0.74 – 1.28)           | 0.8474                          | 0.87 (0.59 – 1.27)           | 0.4668                          | 1.10 (0.74 – 1.65)           | 0.6290                          |
| LPC C17:0   | 1.36 (1.01 – 1.85)           | 0.0454*                         | 1.03 (0.67 – 1.60)           | 0.8951                          | 1.77 (1.15 – 2.72)           | 0.0089*                         |
| LPC C18:0   | 1.49 (1.05 – 2.12)           | 0.0256*                         | 1.24 (0.73 – 2.09)           | 0.4280                          | 1.75 (1.08 – 2.81)           | 0.0225*                         |
| LPC C18:1   | 1.35 (0.97 – 1.87)           | 0.0787                          | 1.21 (0.75 – 1.94)           | 0.4349                          | 1.49 (0.94 – 2.37)           | 0.0909                          |
| LPC C18:2   | 1.13 (0.87 – 1.47)           | 0.3486                          | 1.02 (0.70 – 1.50)           | 0.9020                          | 1.24 (0.87 – 1.79)           | 0.2397                          |
| LPC C20:3   | 1.15 (0.85 – 1.56)           | 0.3803                          | 1.14 (0.72 – 1.81)           | 0.5722                          | 1.15 (0.76 – 1.73)           | 0.5016                          |
| LPC C20:4   | 1.28 (0.95 – 1.74)           | 0.1095                          | 1.24 (0.81 – 1.92)           | 0.3256                          | 1.32 (0.86 – 2.02)           | 0.2017                          |
| LPC C24:0   | 0.91 (0.74 – 1.11)           | 0.3575                          | 0.92 (0.67 – 1.27)           | 0.6046                          | 0.90 (0.70 – 1.17)           | 0.4453                          |
| SM-OH C14:1 | 1.03 (0.74 – 1.45)           | 0.8493                          | 0.99 (0.61 – 1.62)           | 0.9671                          | 1.07 (0.68 – 1.71)           | 0.7640                          |
| SM-OH C16:1 | 1.02 (0.72 – 1.43)           | 0.9328                          | 0.96 (0.58 – 1.59)           | 0.8612                          | 1.07 (0.67 – 1.70)           | 0.7825                          |
| SM-OH C22:1 | 1.06 (0.76 – 1.50)           | 0.7267                          | 1.10 (0.68 – 1.79)           | 0.6899                          | 1.02 (0.63 – 1.66)           | 0.9239                          |
| SM C16:0    | 1.25 (0.83 – 1.88)           | 0.2782                          | 1.46 (0.80 – 2.66)           | 0.2167                          | 1.10 (0.63 – 1.91)           | 0.7414                          |
| SM C16:1    | 1.29 (0.84 – 1.96)           | 0.2461                          | 1.25 (0.66 – 2.39)           | 0.4982                          | 1.31 (0.75 – 2.30)           | 0.3437                          |
| SM C18:0    | 1.13 (0.77 – 1.65)           | 0.5457                          | 1.11 (0.63 – 1.96)           | 0.7273                          | 1.14 (0.68 – 1.90)           | 0.6179                          |
| SM C18:1    | 1.19 (0.83 – 1.72)           | 0.3442                          | 1.17 (0.67 – 2.06)           | 0.5780                          | 1.21 (0.75 – 1.95)           | 0.4421                          |
| SM C24:1    | 1.29 (0.88 – 1.91)           | 0.1974                          | 1.61 (0.91 – 2.85)           | 0.1027                          | 1.06 (0.63 – 1.81)           | 0.8197                          |
| HI          | 1.57 (0.92 – 2.70)           | 0.1009                          | 1.75 (0.80 – 3.85)           | 0.1625                          | 1.42 (0.67 – 3.01)           | 0.3573                          |

**Additional file 3: (Continued)**

| Metabolite                                                                               | 40-60 years <sup>a</sup>     |                                 | 40-50 years <sup>a</sup>     |                                 | 60 years <sup>a</sup>        |                                 |
|------------------------------------------------------------------------------------------|------------------------------|---------------------------------|------------------------------|---------------------------------|------------------------------|---------------------------------|
|                                                                                          | OR <sub>crude</sub> (95% CI) | p <sub>crude</sub> <sup>b</sup> | OR <sub>crude</sub> (95% CI) | p <sub>crude</sub> <sup>b</sup> | OR <sub>crude</sub> (95% CI) | p <sub>crude</sub> <sup>b</sup> |
| <b>Metabolites measured with NMR and non-aggressive prostate cancer risk<sup>a</sup></b> |                              |                                 |                              |                                 |                              |                                 |
| 2-Aminobutyrate                                                                          | 0.88 (0.62 – 1.25)           | 0.4568                          | 0.85 (0.51 – 1.41)           | 0.5285                          | 0.90 (0.55 – 1.47)           | 0.6716                          |
| 2-Hydroxybutyrate                                                                        | 0.90 (0.70 – 1.15)           | 0.3978                          | 0.90 (0.63 – 1.29)           | 0.5646                          | 0.90 (0.63 – 1.27)           | 0.5358                          |
| 2-Hydroxyisovalerate                                                                     | 0.96 (0.77 – 1.19)           | 0.6970                          | 1.02 (0.74 – 1.40)           | 0.9219                          | 0.91 (0.67 – 1.23)           | 0.5303                          |
| 2-Ketoglutarate                                                                          | 0.92 (0.55 – 1.55)           | 0.7583                          | 0.70 (0.34 – 1.42)           | 0.3166                          | 1.29 (0.59 – 2.80)           | 0.5224                          |
| 2-Oxoisocaproate                                                                         | 0.81 (0.57 – 1.15)           | 0.2418                          | 0.81 (0.50 – 1.31)           | 0.3879                          | 0.82 (0.49 – 1.35)           | 0.4290                          |
| 3-Hydroxybutyrate                                                                        | 1.00 (0.90 – 1.11)           | 0.9885                          | 1.02 (0.88 – 1.18)           | 0.8016                          | 0.98 (0.85 – 1.13)           | 0.7908                          |
| 3-Hydroxyisovalerate                                                                     | 0.73 (0.49 – 1.09)           | 0.1210                          | 0.78 (0.45 – 1.36)           | 0.3876                          | 0.68 (0.39 – 1.20)           | 0.1837                          |
| Acetate                                                                                  | 1.05 (0.87 – 1.27)           | 0.5964                          | 1.07 (0.84 – 1.37)           | 0.5876                          | 1.03 (0.77 – 1.37)           | 0.8586                          |
| Acetoacetate                                                                             | 0.96 (0.87 – 1.05)           | 0.3593                          | 0.98 (0.86 – 1.12)           | 0.7850                          | 0.94 (0.82 – 1.06)           | 0.3155                          |
| Acetylcarnitine                                                                          | 1.11 (0.83 – 1.47)           | 0.4895                          | 1.05 (0.70 – 1.58)           | 0.8076                          | 1.15 (0.78 – 1.71)           | 0.4708                          |
| Alanine                                                                                  | 0.92 (0.64 – 1.31)           | 0.6333                          | 0.86 (0.52 – 1.42)           | 0.5539                          | 0.98 (0.59 – 1.62)           | 0.9331                          |
| Arginine                                                                                 | 0.81 (0.45 – 1.46)           | 0.4749                          | 0.74 (0.33 – 1.68)           | 0.4748                          | 0.88 (0.37 – 2.09)           | 0.7775                          |
| Asparagine                                                                               | 0.99 (0.56 – 1.78)           | 0.9802                          | 1.23 (0.54 – 2.79)           | 0.6216                          | 0.80 (0.35 – 1.83)           | 0.5944                          |
| Betaine                                                                                  | 1.15 (0.66 – 2.02)           | 0.6217                          | 0.61 (0.27 – 1.38)           | 0.2384                          | 2.17 (0.96 – 4.89)           | 0.0618                          |
| Carnitine                                                                                | 1.25 (0.80 – 1.97)           | 0.3331                          | 1.16 (0.59 – 2.30)           | 0.6634                          | 1.33 (0.72 – 2.43)           | 0.3631                          |
| Choline                                                                                  | 1.43 (0.89 – 2.31)           | 0.1440                          | 0.98 (0.52 – 1.88)           | 0.9565                          | 2.20 (1.08 – 4.47)           | 0.0290*                         |
| Citrate                                                                                  | 1.48 (0.99 – 2.20)           | 0.0565                          | 1.57 (0.89 – 2.77)           | 0.1209                          | 1.39 (0.79 – 2.44)           | 0.2522                          |
| Creatine                                                                                 | 0.93 (0.78 – 1.12)           | 0.4377                          | 0.87 (0.66 – 1.14)           | 0.3082                          | 0.98 (0.78 – 1.25)           | 0.8828                          |
| Creatinine                                                                               | 1.17 (0.69 – 1.97)           | 0.5576                          | 1.24 (0.54 – 2.86)           | 0.6106                          | 1.13 (0.57 – 2.20)           | 0.7316                          |
| Dimethylglycine                                                                          | 1.01 (0.74 – 1.38)           | 0.9560                          | 0.90 (0.57 – 1.44)           | 0.6644                          | 1.10 (0.73 – 1.68)           | 0.6449                          |
| Dimethylsulfone                                                                          | 1.08 (0.87 – 1.35)           | 0.4976                          | 1.24 (0.89 – 1.73)           | 0.2093                          | 0.97 (0.72 – 1.30)           | 0.8287                          |
| Formate                                                                                  | 1.31 (0.82 – 2.08)           | 0.2546                          | 1.02 (0.53 – 1.96)           | 0.9578                          | 1.66 (0.86 – 3.19)           | 0.1289                          |
| Glucose                                                                                  | 1.34 (0.72 – 2.49)           | 0.3512                          | 1.29 (0.51 – 3.24)           | 0.5862                          | 1.39 (0.60 – 3.19)           | 0.4435                          |
| Glutamate                                                                                | 1.00 (0.81 – 1.23)           | 1.0000                          | 0.97 (0.73 – 1.29)           | 0.8419                          | 1.03 (0.76 – 1.40)           | 0.8329                          |
| Glutamine                                                                                | 0.84 (0.47 – 1.50)           | 0.5523                          | 1.05 (0.50 – 2.23)           | 0.8949                          | 0.60 (0.24 – 1.50)           | 0.2722                          |
| Glycine                                                                                  | 1.32 (0.87 – 1.99)           | 0.1938                          | 2.01 (1.13 – 3.58)           | 0.0180*                         | 0.78 (0.41 – 1.46)           | 0.4271                          |
| Histidine                                                                                | 0.77 (0.39 – 1.52)           | 0.4526                          | 1.22 (0.48 – 3.11)           | 0.6778                          | 0.47 (0.18 – 1.25)           | 0.1307                          |
| Isocaproate                                                                              | 1.94 (0.54 – 7.04)           | 0.3133                          | 1.24 (0.20 – 7.73)           | 0.8168                          | 2.99 (0.49 – 18.3)           | 0.2360                          |
| Isoleucine                                                                               | 0.95 (0.58 – 1.58)           | 0.8554                          | 0.88 (0.43 – 1.81)           | 0.7333                          | 1.03 (0.51 – 2.10)           | 0.9343                          |
| Lactate                                                                                  | 0.98 (0.77 – 1.25)           | 0.8765                          | 1.03 (0.75 – 1.43)           | 0.8408                          | 0.92 (0.65 – 1.31)           | 0.6517                          |
| Leucine                                                                                  | 0.92 (0.53 – 1.61)           | 0.7729                          | 0.95 (0.43 – 2.13)           | 0.9080                          | 0.89 (0.41 – 1.95)           | 0.7717                          |
| Lysine                                                                                   | 0.75 (0.44 – 1.29)           | 0.3008                          | 0.78 (0.36 – 1.70)           | 0.5327                          | 0.72 (0.34 – 1.55)           | 0.4016                          |
| Methionine                                                                               | 0.71 (0.38 – 1.33)           | 0.2852                          | 0.75 (0.31 – 1.81)           | 0.5203                          | 0.68 (0.28 – 1.63)           | 0.3868                          |
| Myo-inositol                                                                             | 1.06 (0.72 – 1.58)           | 0.7550                          | 1.09 (0.61 – 1.96)           | 0.7792                          | 1.05 (0.62 – 1.77)           | 0.8667                          |
| O-phosphocholine                                                                         | 0.80 (0.62 – 1.05)           | 0.1020                          | 0.77 (0.54 – 1.11)           | 0.1596                          | 0.84 (0.57 – 1.24)           | 0.3775                          |
| Ornithine                                                                                | 1.07 (0.73 – 1.57)           | 0.7134                          | 1.48 (0.87 – 2.53)           | 0.1492                          | 0.76 (0.44 – 1.32)           | 0.3343                          |
| Phenylalanine                                                                            | 0.74 (0.38 – 1.41)           | 0.3547                          | 1.08 (0.42 – 2.82)           | 0.8702                          | 0.53 (0.22 – 1.29)           | 0.1586                          |
| Proline                                                                                  | 0.92 (0.65 – 1.30)           | 0.6185                          | 0.97 (0.58 – 1.62)           | 0.9038                          | 0.87 (0.54 – 1.41)           | 0.5707                          |
| Pyruvate                                                                                 | 0.76 (0.61 – 0.95)           | 0.0173*                         | 0.64 (0.46 – 0.89)           | 0.0075*                         | 0.94 (0.68 – 1.30)           | 0.6939                          |
| Serine                                                                                   | 0.86 (0.55 – 1.34)           | 0.4933                          | 0.96 (0.51 – 1.81)           | 0.8971                          | 0.76 (0.41 – 1.44)           | 0.4022                          |
| Threonine                                                                                | 0.95 (0.56 – 1.62)           | 0.8610                          | 1.11 (0.53 – 2.32)           | 0.7917                          | 0.82 (0.39 – 1.74)           | 0.6067                          |
| Trimethylamine                                                                           | 0.98 (0.77 – 1.24)           | 0.8451                          | 1.20 (0.85 – 1.69)           | 0.3123                          | 0.82 (0.59 – 1.13)           | 0.2259                          |
| Trimethylamine-N-oxide                                                                   | 0.92 (0.73 – 1.17)           | 0.4946                          | 0.90 (0.67 – 1.22)           | 0.5072                          | 0.95 (0.65 – 1.38)           | 0.7888                          |
| Tyrosine                                                                                 | 0.79 (0.48 – 1.32)           | 0.3705                          | 0.89 (0.43 – 1.84)           | 0.7465                          | 0.71 (0.35 – 1.45)           | 0.3502                          |
| Valine                                                                                   | 0.92 (0.52 – 1.65)           | 0.7878                          | 0.88 (0.38 – 2.03)           | 0.7627                          | 0.97 (0.43 – 2.18)           | 0.9351                          |

**Additional file 3: (Continued)**

| Metabolite                                                                          | 40-60 years <sup>a</sup>     |                                 | 40-50 years <sup>a</sup>     |                                 | 60 years <sup>a</sup>        |                                 |
|-------------------------------------------------------------------------------------|------------------------------|---------------------------------|------------------------------|---------------------------------|------------------------------|---------------------------------|
|                                                                                     | OR <sub>crude</sub> (95% CI) | p <sub>crude</sub> <sup>b</sup> | OR <sub>crude</sub> (95% CI) | p <sub>crude</sub> <sup>b</sup> | OR <sub>crude</sub> (95% CI) | p <sub>crude</sub> <sup>b</sup> |
| <b>Metabolites measured with MS and aggressive prostate cancer risk<sup>a</sup></b> |                              |                                 |                              |                                 |                              |                                 |
| C0                                                                                  | 0.85 (0.41 – 1.76)           | 0.6596                          | 2.26 (0.54 – 9.51)           | 0.2663                          | 0.58 (0.24 – 1.40)           | 0.2262                          |
| C2                                                                                  | 1.33 (0.80 – 2.21)           | 0.2738                          | 2.10 (0.80 – 5.54)           | 0.1339                          | 1.08 (0.58 – 2.00)           | 0.8113                          |
| C3                                                                                  | 1.57 (0.94 – 2.63)           | 0.0867                          | 3.09 (1.10 – 8.71)           | 0.0328*                         | 1.17 (0.63 – 2.18)           | 0.6136                          |
| C4                                                                                  | 1.20 (0.77 – 1.85)           | 0.4262                          | 2.55 (1.09 – 5.95)           | 0.0306*                         | 0.81 (0.47 – 1.41)           | 0.4624                          |
| C5                                                                                  | 1.53 (0.82 – 2.88)           | 0.1852                          | 4.20 (1.03 – 17.1)           | 0.0454*                         | 1.10 (0.53 – 2.28)           | 0.8075                          |
| C10                                                                                 | 1.05 (0.72 – 1.54)           | 0.7989                          | 1.59 (0.79 – 3.19)           | 0.1934                          | 0.86 (0.53 – 1.37)           | 0.5183                          |
| C16                                                                                 | 0.83 (0.43 – 1.62)           | 0.5850                          | 0.88 (0.26 – 2.98)           | 0.8321                          | 0.81 (0.37 – 1.80)           | 0.6076                          |
| C18:1                                                                               | 0.67 (0.37 – 1.20)           | 0.1740                          | 0.73 (0.22 – 2.38)           | 0.6003                          | 0.65 (0.33 – 1.27)           | 0.2062                          |
| C18:2                                                                               | 0.51 (0.29 – 0.89)           | 0.0167*                         | 0.44 (0.14 – 1.41)           | 0.1658                          | 0.53 (0.29 – 1.00)           | 0.0488*                         |
| Ala                                                                                 | 1.11 (0.58 – 2.12)           | 0.7442                          | 0.81 (0.27 – 2.48)           | 0.7124                          | 1.31 (0.59 – 2.90)           | 0.5083                          |
| Arg                                                                                 | 1.46 (0.79 – 2.69)           | 0.2254                          | 1.01 (0.36 – 2.82)           | 0.9816                          | 1.78 (0.83 – 3.84)           | 0.1398                          |
| His                                                                                 | 0.65 (0.23 – 1.81)           | 0.4078                          | 0.94 (0.14 – 6.43)           | 0.9516                          | 0.56 (0.17 – 1.89)           | 0.3492                          |
| Ile                                                                                 | 1.37 (0.63 – 2.96)           | 0.4292                          | 1.78 (0.45 – 7.06)           | 0.4145                          | 1.21 (0.47 – 3.09)           | 0.6952                          |
| Leu                                                                                 | 1.68 (0.69 – 4.11)           | 0.2556                          | 2.48 (0.51 – 12.0)           | 0.2584                          | 1.38 (0.46 – 4.14)           | 0.5645                          |
| Lys                                                                                 | 0.92 (0.42 – 2.03)           | 0.8336                          | 0.89 (0.19 – 4.10)           | 0.8763                          | 0.93 (0.37 – 2.36)           | 0.8797                          |
| Orn                                                                                 | 0.71 (0.41 – 1.23)           | 0.2233                          | 1.18 (0.37 – 3.74)           | 0.7738                          | 0.61 (0.33 – 1.15)           | 0.1274                          |
| Phe                                                                                 | 1.09 (0.40 – 2.93)           | 0.8681                          | 1.08 (0.13 – 9.31)           | 0.9416                          | 1.09 (0.36 – 3.32)           | 0.8815                          |
| Pro                                                                                 | 1.12 (0.58 – 2.16)           | 0.7423                          | 1.25 (0.39 – 3.98)           | 0.7037                          | 1.06 (0.47 – 2.36)           | 0.8924                          |
| Trp                                                                                 | 1.03 (0.46 – 2.29)           | 0.9478                          | 0.65 (0.17 – 2.53)           | 0.5338                          | 1.32 (0.49 – 3.60)           | 0.5860                          |
| Tyr                                                                                 | 0.81 (0.41 – 1.61)           | 0.5513                          | 0.61 (0.14 – 2.68)           | 0.5159                          | 0.88 (0.41 – 1.90)           | 0.7422                          |
| Creatinine                                                                          | 1.84 (0.63 – 5.38)           | 0.2653                          | 2.3 (0.18 – 28.75)           | 0.5182                          | 1.75 (0.54 – 5.73)           | 0.3543                          |
| Spermidine                                                                          | 1.07 (0.78 – 1.48)           | 0.6734                          | 0.74 (0.41 – 1.35)           | 0.3230                          | 1.26 (0.85 – 1.87)           | 0.2456                          |
| Taurine                                                                             | 1.67 (0.90 – 3.10)           | 0.1034                          | 0.96 (0.30 – 3.04)           | 0.9383                          | 2.10 (0.99 – 4.46)           | 0.0548                          |
| PC aa C28:1                                                                         | 1.45 (0.70 – 3.03)           | 0.3221                          | 1.56 (0.30 – 8.04)           | 0.5954                          | 1.42 (0.63 – 3.24)           | 0.4002                          |
| PC aa C30:0                                                                         | 1.35 (0.80 – 2.30)           | 0.2655                          | 1.80 (0.63 – 5.14)           | 0.2747                          | 1.22 (0.66 – 2.27)           | 0.5319                          |
| PC aa C32:0                                                                         | 1.21 (0.56 – 2.62)           | 0.6280                          | 2.20 (0.49 – 9.85)           | 0.3038                          | 0.96 (0.39 – 2.39)           | 0.9340                          |
| PC aa C32:1                                                                         | 0.96 (0.66 – 1.39)           | 0.8242                          | 0.96 (0.51 – 1.84)           | 0.9116                          | 0.96 (0.61 – 1.51)           | 0.8464                          |
| PC aa C32:2                                                                         | 0.94 (0.65 – 1.35)           | 0.7386                          | 1.08 (0.55 – 2.11)           | 0.8245                          | 0.89 (0.57 – 1.37)           | 0.5891                          |
| PC aa C34:1                                                                         | 1.08 (0.52 – 2.23)           | 0.8418                          | 0.88 (0.23 – 3.41)           | 0.8549                          | 1.17 (0.49 – 2.78)           | 0.7237                          |
| PC aa C34:2                                                                         | 0.69 (0.33 – 1.45)           | 0.3256                          | 0.69 (0.17 – 2.85)           | 0.6039                          | 0.69 (0.29 – 1.66)           | 0.4038                          |
| PC aa C34:3                                                                         | 0.74 (0.39 – 1.38)           | 0.3437                          | 0.34 (0.08 – 1.42)           | 0.1392                          | 0.91 (0.45 – 1.85)           | 0.7919                          |
| PC aa C34:4                                                                         | 1.22 (0.74 – 2.01)           | 0.4478                          | 1.18 (0.49 – 2.83)           | 0.7145                          | 1.23 (0.67 – 2.27)           | 0.5026                          |
| PC aa C36:0                                                                         | 1.11 (0.69 – 1.78)           | 0.6642                          | 1.85 (0.80 – 4.30)           | 0.1504                          | 0.83 (0.46 – 1.51)           | 0.5451                          |
| PC aa C36:1                                                                         | 1.20 (0.59 – 2.43)           | 0.6217                          | 0.74 (0.18 – 3.05)           | 0.6756                          | 1.41 (0.62 – 3.20)           | 0.4168                          |
| PC aa C36:2                                                                         | 1.04 (0.48 – 2.24)           | 0.9197                          | 1.51 (0.35 – 6.40)           | 0.5795                          | 0.90 (0.36 – 2.22)           | 0.8141                          |
| PC aa C36:3                                                                         | 1.37 (0.61 – 3.12)           | 0.4472                          | 2.73 (0.46 – 16.2)           | 0.2691                          | 1.13 (0.45 – 2.86)           | 0.7993                          |
| PC aa C36:4                                                                         | 1.42 (0.71 – 2.85)           | 0.3219                          | 1.27 (0.37 – 4.36)           | 0.7098                          | 1.50 (0.65 – 3.49)           | 0.3452                          |
| PC aa C36:5                                                                         | 1.12 (0.78 – 1.61)           | 0.5286                          | 1.30 (0.64 – 2.62)           | 0.4708                          | 1.07 (0.70 – 1.62)           | 0.7642                          |
| PC aa C36:6                                                                         | 1.11 (0.73 – 1.70)           | 0.6205                          | 1.51 (0.67 – 3.38)           | 0.3192                          | 0.98 (0.59 – 1.63)           | 0.9513                          |
| PC aa C38:0                                                                         | 0.74 (0.41 – 1.31)           | 0.2977                          | 1.57 (0.53 – 4.64)           | 0.4108                          | 0.53 (0.26 – 1.07)           | 0.0782                          |
| PC aa C38:3                                                                         | 1.37 (0.64 – 2.93)           | 0.4227                          | 1.54 (0.41 – 5.73)           | 0.5194                          | 1.28 (0.50 – 3.28)           | 0.6010                          |
| PC aa C38:4                                                                         | 1.46 (0.75 – 2.84)           | 0.2648                          | 1.13 (0.36 – 3.58)           | 0.8359                          | 1.66 (0.73 – 3.76)           | 0.2249                          |
| PC aa C38:5                                                                         | 1.52 (0.83 – 2.78)           | 0.1754                          | 2.38 (0.73 – 7.75)           | 0.1515                          | 1.28 (0.63 – 2.61)           | 0.4952                          |
| PC aa C38:6                                                                         | 0.92 (0.54 – 1.57)           | 0.7626                          | 1.55 (0.62 – 3.92)           | 0.3517                          | 0.70 (0.36 – 1.36)           | 0.2934                          |
| PC aa C40:1                                                                         | 0.72 (0.36 – 1.45)           | 0.3584                          | 0.96 (0.29 – 3.23)           | 0.9500                          | 0.63 (0.27 – 1.47)           | 0.2844                          |
| PC aa C40:3                                                                         | 1.12 (0.60 – 2.11)           | 0.7264                          | 1.80 (0.46 – 7.11)           | 0.3990                          | 0.98 (0.48 – 2.00)           | 0.9554                          |
| PC aa C40:4                                                                         | 1.81 (1.03 – 3.19)           | 0.0396*                         | 2.11 (0.74 – 6.04)           | 0.1621                          | 1.70 (0.87 – 3.33)           | 0.1233                          |
| PC aa C40:5                                                                         | 1.41 (0.78 – 2.54)           | 0.2530                          | 2.06 (0.63 – 6.74)           | 0.2323                          | 1.24 (0.63 – 2.45)           | 0.5388                          |
| PC aa C40:6                                                                         | 0.96 (0.58 – 1.59)           | 0.8773                          | 1.53 (0.60 – 3.90)           | 0.3755                          | 0.79 (0.43 – 1.45)           | 0.4388                          |
| PC aa C42:0                                                                         | 0.92 (0.51 – 1.65)           | 0.7686                          | 1.98 (0.60 – 6.53)           | 0.2639                          | 0.70 (0.35 – 1.40)           | 0.3159                          |
| PC aa C42:1                                                                         | 0.78 (0.43 – 1.41)           | 0.4089                          | 1.44 (0.50 – 4.15)           | 0.5040                          | 0.59 (0.29 – 1.21)           | 0.1503                          |
| PC aa C42:4                                                                         | 1.30 (0.73 – 2.34)           | 0.3765                          | 1.04 (0.41 – 2.66)           | 0.9300                          | 1.50 (0.71 – 3.19)           | 0.2899                          |
| PC aa C42:5                                                                         | 1.06 (0.62 – 1.81)           | 0.8452                          | 1.38 (0.49 – 3.88)           | 0.5407                          | 0.95 (0.50 – 1.80)           | 0.8799                          |

**Additional file 3: (Continued)**

| Metabolite  | 40-60 years <sup>a</sup>     |                                 | 40-50 years <sup>a</sup>     |                                 | 60 years <sup>a</sup>        |                                 |
|-------------|------------------------------|---------------------------------|------------------------------|---------------------------------|------------------------------|---------------------------------|
|             | OR <sub>crude</sub> (95% CI) | p <sub>crude</sub> <sup>b</sup> | OR <sub>crude</sub> (95% CI) | p <sub>crude</sub> <sup>b</sup> | OR <sub>crude</sub> (95% CI) | p <sub>crude</sub> <sup>b</sup> |
| PC ae C30:2 | 1.37 (0.84 – 2.21)           | 0.2038                          | 1.29 (0.53 – 3.17)           | 0.5790                          | 1.40 (0.79 – 2.47)           | 0.2498                          |
| PC ae C34:0 | 1.62 (0.91 – 2.90)           | 0.1040                          | 1.59 (0.44 – 5.71)           | 0.4775                          | 1.63 (0.85 – 3.13)           | 0.1437                          |
| PC ae C34:1 | 1.31 (0.61 – 2.79)           | 0.4929                          | 1.00 (0.21 – 4.69)           | 0.9993                          | 1.42 (0.59 – 3.41)           | 0.4318                          |
| PC ae C34:2 | 1.12 (0.59 – 2.10)           | 0.7374                          | 1.07 (0.30 – 3.76)           | 0.9206                          | 1.13 (0.54 – 2.36)           | 0.7414                          |
| PC ae C34:3 | 1.02 (0.58 – 1.78)           | 0.9543                          | 0.91 (0.31 – 2.65)           | 0.8600                          | 1.06 (0.55 – 2.05)           | 0.8603                          |
| PC ae C36:1 | 2.16 (1.05 – 4.44)           | 0.0358*                         | 1.83 (0.36 – 9.23)           | 0.4629                          | 2.25 (1.01 – 5.04)           | 0.0482*                         |
| PC ae C36:2 | 2.15 (1.03 – 4.48)           | 0.0415*                         | 2.11 (0.46 – 9.70)           | 0.3362                          | 2.16 (0.93 – 5.00)           | 0.0722                          |
| PC ae C36:3 | 1.06 (0.52 – 2.15)           | 0.8791                          | 1.22 (0.30 – 5.07)           | 0.7812                          | 1.01 (0.44 – 2.28)           | 0.9880                          |
| PC ae C36:4 | 1.41 (0.76 – 2.63)           | 0.2771                          | 1.39 (0.44 – 4.38)           | 0.5733                          | 1.42 (0.68 – 2.98)           | 0.3523                          |
| PC ae C36:5 | 1.54 (0.86 – 2.77)           | 0.1463                          | 1.46 (0.55 – 3.84)           | 0.4441                          | 1.59 (0.77 – 3.32)           | 0.2137                          |
| PC ae C38:0 | 1.01 (0.59 – 1.72)           | 0.9741                          | 1.38 (0.50 – 3.85)           | 0.5334                          | 0.90 (0.48 – 1.68)           | 0.7289                          |
| PC ae C38:1 | 1.18 (0.98 – 1.42)           | 0.0852                          | 1.37 (0.91 – 2.05)           | 0.1315                          | 1.13 (0.92 – 1.39)           | 0.2556                          |
| PC ae C38:2 | 1.30 (0.73 – 2.34)           | 0.3773                          | 1.62 (0.48 – 5.52)           | 0.4387                          | 1.22 (0.63 – 2.38)           | 0.5621                          |
| PC ae C38:3 | 3.29 (1.50 – 7.24)           | 0.0030*                         | 4.17 (0.76 – 23.0)           | 0.1005                          | 3.08 (1.26 – 7.49)           | 0.0133*                         |
| PC ae C38:4 | 2.69 (1.25 – 5.76)           | 0.0110*                         | 2.04 (0.47 – 8.84)           | 0.3415                          | 2.97 (1.21 – 7.26)           | 0.0172*                         |
| PC ae C38:5 | 1.43 (0.67 – 3.05)           | 0.3569                          | 1.95 (0.47 – 8.10)           | 0.3609                          | 1.26 (0.51 – 3.10)           | 0.6176                          |
| PC ae C38:6 | 1.16 (0.65 – 2.08)           | 0.6155                          | 2.17 (0.70 – 6.74)           | 0.1821                          | 0.90 (0.45 – 1.81)           | 0.7693                          |
| PC ae C40:0 | 0.86 (0.48 – 1.54)           | 0.6040                          | 2.12 (0.66 – 6.79)           | 0.2078                          | 0.61 (0.30 – 1.23)           | 0.1642                          |
| PC ae C40:1 | 1.16 (0.62 – 2.19)           | 0.6427                          | 2.03 (0.53 – 7.74)           | 0.3003                          | 0.98 (0.48 – 2.03)           | 0.9605                          |
| PC ae C40:2 | 2.49 (1.25 – 4.97)           | 0.0095*                         | 3.17 (0.56 – 17.8)           | 0.1909                          | 2.38 (1.12 – 5.04)           | 0.0239*                         |
| PC ae C40:3 | 1.55 (0.73 – 3.28)           | 0.2505                          | 1.51 (0.29 – 7.89)           | 0.6246                          | 1.56 (0.67 – 3.62)           | 0.2982                          |
| PC ae C40:5 | 1.28 (0.58 – 2.81)           | 0.5384                          | 1.75 (0.40 – 7.68)           | 0.4565                          | 1.13 (0.44 – 2.86)           | 0.8012                          |
| PC ae C40:6 | 1.55 (0.82 – 2.92)           | 0.1773                          | 4.26 (1.03 – 17.6)           | 0.0452*                         | 1.15 (0.56 – 2.36)           | 0.6997                          |
| PC ae C42:1 | 1.19 (0.63 – 2.25)           | 0.5859                          | 1.52 (0.47 – 4.89)           | 0.4817                          | 1.08 (0.50 – 2.30)           | 0.8521                          |
| PC ae C42:2 | 1.81 (0.92 – 3.54)           | 0.0842                          | 4.45 (1.04 – 19.1)           | 0.0448*                         | 1.37 (0.64 – 2.94)           | 0.4213                          |
| PC ae C42:3 | 1.18 (0.59 – 2.34)           | 0.6414                          | 1.98 (0.52 – 7.48)           | 0.3164                          | 0.97 (0.43 – 2.17)           | 0.9347                          |
| PC ae C42:4 | 1.64 (0.77 – 3.49)           | 0.1963                          | 2.5 (0.56 – 11.15)           | 0.2311                          | 1.42 (0.59 – 3.40)           | 0.4376                          |
| PC ae C42:5 | 1.25 (0.53 – 2.94)           | 0.6053                          | 1.45 (0.28 – 7.45)           | 0.6558                          | 1.19 (0.44 – 3.23)           | 0.7391                          |
| PC ae C44:3 | 0.71 (0.40 – 1.24)           | 0.2311                          | 0.90 (0.31 – 2.65)           | 0.8496                          | 0.65 (0.34 – 1.26)           | 0.2004                          |
| PC ae C44:4 | 1.61 (0.84 – 3.06)           | 0.1514                          | 2.79 (0.77 – 10.2)           | 0.1199                          | 1.31 (0.62 – 2.78)           | 0.4861                          |
| PC ae C44:5 | 1.00 (0.52 – 1.94)           | 0.9902                          | 0.88 (0.23 – 3.30)           | 0.8437                          | 1.05 (0.49 – 2.24)           | 0.8990                          |
| PC ae C44:6 | 0.89 (0.45 – 1.75)           | 0.7314                          | 1.72 (0.46 – 6.53)           | 0.4233                          | 0.70 (0.32 – 1.55)           | 0.3769                          |
| LPC C16:0   | 2.01 (1.01 – 3.99)           | 0.0475*                         | 1.58 (0.44 – 5.71)           | 0.4850                          | 2.20 (0.97 – 4.97)           | 0.0579                          |
| LPC C16:1   | 1.62 (0.92 – 2.86)           | 0.0970                          | 1.64 (0.45 – 6.02)           | 0.4532                          | 1.61 (0.86 – 3.04)           | 0.1387                          |
| LPC C17:0   | 2.67 (1.48 – 4.83)           | 0.0011*                         | 1.77 (0.53 – 5.94)           | 0.3579                          | 3.02 (1.52 – 6.01)           | 0.0016*                         |
| LPC C18:0   | 2.01 (1.02 – 3.94)           | 0.0426*                         | 1.83 (0.50 – 6.74)           | 0.3659                          | 2.08 (0.95 – 4.56)           | 0.0684                          |
| LPC C18:1   | 1.57 (0.84 – 2.95)           | 0.1611                          | 1.27 (0.34 – 4.79)           | 0.7216                          | 1.67 (0.81 – 3.41)           | 0.1624                          |
| LPC C18:2   | 1.44 (0.85 – 2.46)           | 0.1780                          | 1.25 (0.49 – 3.17)           | 0.6413                          | 1.54 (0.81 – 2.95)           | 0.1890                          |
| LPC C20:3   | 2.05 (1.12 – 3.75)           | 0.0206*                         | 1.53 (0.43 – 5.48)           | 0.5157                          | 2.21 (1.11 – 4.40)           | 0.0233*                         |
| LPC C20:4   | 1.99 (1.15 – 3.44)           | 0.0142*                         | 1.26 (0.43 – 3.65)           | 0.6755                          | 2.33 (1.22 – 4.45)           | 0.0105*                         |
| LPC C24:0   | 0.95 (0.64 – 1.42)           | 0.8035                          | 1.09 (0.52 – 2.29)           | 0.8156                          | 0.90 (0.56 – 1.45)           | 0.6546                          |
| SM-OH C14:1 | 1.51 (0.74 – 3.07)           | 0.2529                          | 0.99 (0.23 – 4.24)           | 0.9939                          | 1.72 (0.76 – 3.90)           | 0.1920                          |
| SM-OH C16:1 | 1.60 (0.81 – 3.15)           | 0.1753                          | 1.05 (0.23 – 4.78)           | 0.9492                          | 1.77 (0.83 – 3.80)           | 0.1411                          |
| SM-OH C22:1 | 1.94 (0.95 – 3.98)           | 0.0701                          | 1.86 (0.43 – 8.10)           | 0.4110                          | 1.97 (0.87 – 4.47)           | 0.1063                          |
| SM C16:0    | 0.86 (0.38 – 1.95)           | 0.7131                          | 0.89 (0.14 – 5.44)           | 0.8965                          | 0.85 (0.34 – 2.14)           | 0.7291                          |
| SM C16:1    | 0.80 (0.36 – 1.78)           | 0.5783                          | 0.92 (0.15 – 5.69)           | 0.9292                          | 0.77 (0.31 – 1.88)           | 0.5652                          |
| SM C18:0    | 0.76 (0.35 – 1.67)           | 0.4946                          | 0.58 (0.12 – 2.85)           | 0.4987                          | 0.83 (0.34 – 2.07)           | 0.6914                          |
| SM C18:1    | 0.62 (0.29 – 1.30)           | 0.2051                          | 0.70 (0.16 – 2.99)           | 0.6277                          | 0.59 (0.25 – 1.41)           | 0.2362                          |
| SM C24:1    | 1.04 (0.49 – 2.20)           | 0.9294                          | 1.21 (0.27 – 5.40)           | 0.8033                          | 0.98 (0.41 – 2.36)           | 0.9651                          |
| H1          | 1.09 (0.40 – 2.98)           | 0.8669                          | 0.31 (0.03 – 3.33)           | 0.3360                          | 1.47 (0.47 – 4.58)           | 0.5070                          |



### Additional file 3: (Continued)

| Metabolite                                                                           | 40-60 years <sup>a</sup>     |                                 | 40-50 years <sup>a</sup>     |                                 | 60 years <sup>a</sup>        |                                 |
|--------------------------------------------------------------------------------------|------------------------------|---------------------------------|------------------------------|---------------------------------|------------------------------|---------------------------------|
|                                                                                      | OR <sub>crude</sub> (95% CI) | p <sub>crude</sub> <sup>b</sup> | OR <sub>crude</sub> (95% CI) | p <sub>crude</sub> <sup>b</sup> | OR <sub>crude</sub> (95% CI) | p <sub>crude</sub> <sup>b</sup> |
| <b>Metabolites measured with NMR and aggressive prostate cancer risk<sup>a</sup></b> |                              |                                 |                              |                                 |                              |                                 |
| 2-Aminobutyrate                                                                      | 0.66 (0.35 – 1.25)           | 0.1999                          | 0.39 (0.12 – 1.27)           | 0.1177                          | 0.84 (0.39 – 1.84)           | 0.6668                          |
| 2-Hydroxybutyrate                                                                    | 1.10 (0.68 – 1.79)           | 0.6942                          | 0.75 (0.32 – 1.76)           | 0.5105                          | 1.33 (0.73 – 2.42)           | 0.3451                          |
| 2-Hydroxyisovalerate                                                                 | 1.12 (0.68 – 1.84)           | 0.6630                          | 0.97 (0.40 – 2.36)           | 0.9485                          | 1.19 (0.65 – 2.18)           | 0.5686                          |
| 2-Ketoglutarate                                                                      | 0.70 (0.25 – 1.98)           | 0.5043                          | 0.33 (0.05 – 2.34)           | 0.2647                          | 0.97 (0.28 – 3.32)           | 0.9563                          |
| 2-Oxoisocaproate                                                                     | 0.94 (0.48 – 1.86)           | 0.8571                          | 0.77 (0.26 – 2.24)           | 0.6281                          | 1.08 (0.44 – 2.64)           | 0.8619                          |
| 3-Hydroxybutyrate                                                                    | 1.02 (0.83 – 1.26)           | 0.8557                          | 1.11 (0.76 – 1.62)           | 0.6013                          | 0.98 (0.77 – 1.26)           | 0.8954                          |
| 3-Hydroxyisovalerate                                                                 | 0.97 (0.49 – 1.93)           | 0.9350                          | 1.09 (0.22 – 5.43)           | 0.9163                          | 0.95 (0.44 – 2.02)           | 0.8888                          |
| Acetate                                                                              | 1.24 (0.86 – 1.78)           | 0.2530                          | 1.82 (0.90 – 3.66)           | 0.0934                          | 1.05 (0.68 – 1.63)           | 0.8187                          |
| Acetoacetate                                                                         | 0.94 (0.78 – 1.13)           | 0.4847                          | 1.00 (0.66 – 1.52)           | 0.9891                          | 0.92 (0.75 – 1.13)           | 0.4317                          |
| Acetylcarnitine                                                                      | 0.99 (0.55 – 1.79)           | 0.9774                          | 1.57 (0.51 – 4.83)           | 0.4346                          | 0.83 (0.41 – 1.67)           | 0.5936                          |
| Alanine                                                                              | 0.67 (0.32 – 1.38)           | 0.2740                          | 0.58 (0.15 – 2.22)           | 0.4286                          | 0.71 (0.30 – 1.67)           | 0.4295                          |
| Arginine                                                                             | 1.07 (0.33 – 3.45)           | 0.9146                          | 0.47 (0.06 – 4.02)           | 0.4891                          | 1.54 (0.37 – 6.39)           | 0.5501                          |
| Asparagine                                                                           | 0.56 (0.17 – 1.80)           | 0.3278                          | 1.32 (0.13 – 13.4)           | 0.8129                          | 0.41 (0.10 – 1.63)           | 0.2053                          |
| Betaine                                                                              | 0.80 (0.24 – 2.69)           | 0.7206                          | 1.37 (0.07 – 28.3)           | 0.8384                          | 0.72 (0.19 – 2.72)           | 0.6316                          |
| Carnitine                                                                            | 0.48 (0.21 – 1.10)           | 0.0821                          | 1.29 (0.25 – 6.69)           | 0.7641                          | 0.35 (0.13 – 0.92)           | 0.0340*                         |
| Choline                                                                              | 0.59 (0.22 – 1.59)           | 0.2973                          | 0.20 (0.02 – 2.24)           | 0.1909                          | 0.75 (0.25 – 2.20)           | 0.5968                          |
| Citrate                                                                              | 1.02 (0.51 – 2.05)           | 0.9576                          | 1.40 (0.43 – 4.59)           | 0.5784                          | 0.86 (0.36 – 2.05)           | 0.7312                          |
| Creatine                                                                             | 0.80 (0.59 – 1.07)           | 0.1359                          | 0.95 (0.54 – 1.68)           | 0.8680                          | 0.75 (0.53 – 1.06)           | 0.1031                          |
| Creatinine                                                                           | 0.89 (0.34 – 2.29)           | 0.8058                          | 1.76 (0.18 – 16.9)           | 0.6246                          | 0.77 (0.27 – 2.19)           | 0.6168                          |
| Dimethylglycine                                                                      | 1.66 (0.85 – 3.26)           | 0.1406                          | 3.16 (0.63 – 16.0)           | 0.1633                          | 1.43 (0.68 – 3.01)           | 0.3415                          |
| Dimethylsulfone                                                                      | 1.04 (0.69 – 1.57)           | 0.8458                          | 1.84 (0.85 – 3.94)           | 0.1198                          | 0.79 (0.47 – 1.32)           | 0.3612                          |
| Formate                                                                              | 1.06 (0.45 – 2.51)           | 0.8914                          | 0.72 (0.15 – 3.59)           | 0.6904                          | 1.25 (0.44 – 3.51)           | 0.6734                          |
| Glucose                                                                              | 0.80 (0.27 – 2.38)           | 0.6923                          | 0.15 (0.01 – 2.93)           | 0.2127                          | 1.09 (0.33 – 3.56)           | 0.8912                          |
| Glutamate                                                                            | 0.85 (0.55 – 1.32)           | 0.4663                          | 0.44 (0.16 – 1.19)           | 0.1050                          | 1.02 (0.62 – 1.69)           | 0.9334                          |
| Glutamine                                                                            | 0.15 (0.04 – 0.64)           | 0.0100*                         | 0.22 (0.01 – 5.30)           | 0.3510                          | 0.14 (0.03 – 0.69)           | 0.0161*                         |
| Glycine                                                                              | 0.77 (0.35 – 1.70)           | 0.5176                          | 3.82 (0.46 – 31.6)           | 0.2138                          | 0.53 (0.22 – 1.31)           | 0.1689                          |
| Histidine                                                                            | 0.19 (0.05 – 0.80)           | 0.0232*                         | 0.36 (0.02 – 6.55)           | 0.4868                          | 0.16 (0.03 – 0.82)           | 0.0279*                         |
| Isocaproate                                                                          | 1.36 (0.10 – 18.3)           | 0.8174                          | 1.77 (0.02 – 182)            | 0.8088                          | 1.20 (0.05 – 27.9)           | 0.9088                          |
| Isoleucine                                                                           | 0.96 (0.42 – 2.18)           | 0.9123                          | 0.79 (0.19 – 3.36)           | 0.7500                          | 1.05 (0.38 – 2.87)           | 0.9296                          |
| Lactate                                                                              | 0.88 (0.53 – 1.47)           | 0.6249                          | 0.56 (0.21 – 1.52)           | 0.2496                          | 1.06 (0.57 – 1.97)           | 0.8528                          |
| Leucine                                                                              | 0.91 (0.34 – 2.43)           | 0.8552                          | 0.97 (0.19 – 4.98)           | 0.9744                          | 0.88 (0.26 – 2.99)           | 0.8383                          |
| Lysine                                                                               | 0.54 (0.19 – 1.54)           | 0.2472                          | 0.34 (0.05 – 2.58)           | 0.2965                          | 0.64 (0.19 – 2.20)           | 0.4784                          |
| Methionine                                                                           | 0.50 (0.16 – 1.55)           | 0.2312                          | 0.54 (0.07 – 4.43)           | 0.5666                          | 0.49 (0.13 – 1.85)           | 0.2920                          |
| Myo-inositol                                                                         | 1.17 (0.53 – 2.60)           | 0.7020                          | 2.85 (0.52 – 16.2)           | 0.2386                          | 0.90 (0.37 – 2.24)           | 0.8280                          |
| O-phosphocholine                                                                     | 0.81 (0.50 – 1.32)           | 0.4006                          | 1.07 (0.45 – 2.56)           | 0.8766                          | 0.71 (0.39 – 1.29)           | 0.2668                          |
| Ornithine                                                                            | 0.48 (0.24 – 0.98)           | 0.0429*                         | 0.62 (0.14 – 2.68)           | 0.5196                          | 0.45 (0.20 – 1.01)           | 0.0518                          |
| Phenylalanine                                                                        | 0.59 (0.19 – 1.90)           | 0.3798                          | 0.34 (0.04 – 3.10)           | 0.3361                          | 0.74 (0.19 – 2.91)           | 0.6680                          |
| Proline                                                                              | 0.73 (0.37 – 1.41)           | 0.3472                          | 0.89 (0.30 – 2.68)           | 0.8351                          | 0.65 (0.28 – 1.49)           | 0.3094                          |
| Pyruvate                                                                             | 0.91 (0.58 – 1.43)           | 0.6712                          | 0.79 (0.30 – 2.08)           | 0.6272                          | 0.94 (0.57 – 1.57)           | 0.8231                          |
| Serine                                                                               | 0.77 (0.34 – 1.74)           | 0.5335                          | 2.90 (0.60 – 14.1)           | 0.1875                          | 0.44 (0.16 – 1.18)           | 0.1027                          |
| Threonine                                                                            | 0.53 (0.20 – 1.42)           | 0.2066                          | 0.59 (0.07 – 5.28)           | 0.6366                          | 0.51 (0.17 – 1.56)           | 0.2398                          |
| Trimethylamine                                                                       | 1.15 (0.74 – 1.80)           | 0.5250                          | 1.01 (0.42 – 2.43)           | 0.9781                          | 1.21 (0.72 – 2.02)           | 0.4723                          |
| Trimethylamine-N-oxide                                                               | 1.69 (0.97 – 2.94)           | 0.0663                          | 2.74 (0.95 – 7.90)           | 0.0623                          | 1.37 (0.71 – 2.63)           | 0.3522                          |
| Tyrosine                                                                             | 0.60 (0.25 – 1.42)           | 0.2439                          | 0.44 (0.07 – 2.95)           | 0.4008                          | 0.65 (0.24 – 1.72)           | 0.3828                          |
| Valine                                                                               | 0.82 (0.29 – 2.38)           | 0.7180                          | 1.02 (0.17 – 6.13)           | 0.9810                          | 0.73 (0.20 – 2.73)           | 0.6421                          |

#### <sup>a</sup> Stratifications:

Overall prostate cancer risk in subjects aged 40-60 years (777/747 pairs; MS/NMR), 40-50 years (333/326; MS/NMR), and 60 years (444/421 pairs; MS/NMR).

Non-aggressive prostate cancer risk in subjects aged 40-60 years (608/586 pairs; MS/NMR), 40-50 years (289/283 pairs; MS/NMR), and 60 years (319/303 pairs; MS/NMR).

Aggressive prostate cancer risk in subjects aged 40-60 years (169/161 pairs; MS/NMR), 40-50 years (44/43 pairs; MS/NMR), and 60 years (125/118 pairs; MS/NMR).

Note that the smaller sample size in specific subgroups results in uncertain risk estimates.

<sup>b</sup> Metabolites with nominal p-value <0.05 are marked with (\*).
