# Supplementary material for: Identification of metabolites associated with prostate cancer risk: a nested case-control study with long follow-up in the Northern Sweden Health and Disease Study
Source: PubMed Central journal article supplement (PMC7376662; doi:10.1186/s12916-020-01655-1), 2020-07-23
Supplement: 12916_2020_1655_MOESM4_ESM.pdf [file 12916_2020_1655_MOESM4_ESM.pdf]

**Additional file 4: Associations significant after correction for multiple testing**

| Metabolite <sup>a, b</sup>                      | Method | Model              | 1st quartile    | 2st quartile       | 3rd quartile       | 4th quartile       |
|-------------------------------------------------|--------|--------------------|-----------------|--------------------|--------------------|--------------------|
| <b>Overall prostate cancer (40-60 years)</b>    |        |                    |                 |                    |                    |                    |
| LPC C17:0                                       | MS     | Cut-point (μM)     | ≤1.30           | >1.30 to ≤1.57     | >1.57 to ≤1.89     | >1.89              |
|                                                 |        | OR (95% CI)        | 1.00 (referent) | 1.44 (1.07 – 1.96) | 1.43 (1.06 – 1.94) | 1.63 (1.20 – 2.21) |
|                                                 |        | P-value            | -               | 0.0178             | 0.0184             | 0.0017             |
|                                                 |        | N (cases/controls) | 147/195         | 202/194            | 202/194            | 226/194            |
| LPC C18:0                                       | MS     | Cut-point (μM)     | ≤21.6           | 21.6> to ≤24.7     | 24.7> to ≤28.9     | >28.9              |
|                                                 |        | OR (95% CI)        | 1.00 (referent) | 1.08 (0.81 – 1.45) | 1.32 (1.00 – 1.75) | 1.36 (1.02 – 1.81) |
|                                                 |        | P-value            | -               | 0.5947             | 0.0514             | 0.0342             |
|                                                 |        | N (cases/controls) | 163/195         | 177/194            | 216/194            | 221/194            |
| <b>Overall prostate cancer (40-50 years)</b>    |        |                    |                 |                    |                    |                    |
| Glycine                                         | NMR    | Cut-point (μM)     | ≤170.1          | 170.1> to ≤197.2   | 197.2> to ≤217.7   | >217.7             |
|                                                 |        | OR (95% CI)        | 1.00 (referent) | 1.13 (0.70 – 1.83) | 1.12 (0.70 – 1.81) | 1.75 (1.09 – 2.82) |
|                                                 |        | P-value            | -               | 0.6216             | 0.6316             | 0.0212             |
|                                                 |        | N (cases/controls) | 69/82           | 73/81              | 74/82              | 110/81             |
| Pyruvate                                        | NMR    | Cut-point (μM)     | ≤64.5           | 64.5> to ≤78.8     | 78.8> to ≤99.5     | >99.5              |
|                                                 |        | OR (95% CI)        | 1.00 (referent) | 0.62 (0.40 – 0.97) | 1.04 (0.69 – 1.57) | 0.46 (0.29 – 0.74) |
|                                                 |        | P-value            | -               | 0.0374             | 0.8673             | 0.0013             |
|                                                 |        | N (cases/controls) | 102/82          | 70/81              | 105/82             | 49/81              |
| <b>Overall prostate cancer (60 years)</b>       |        |                    |                 |                    |                    |                    |
| LPC C17:0*                                      | MS     | Cut-point (μM)     | ≤1.26           | >1.26 to ≤1.53     | >1.53 to ≤1.84     | >1.84              |
|                                                 |        | OR (95% CI)        | 1.00 (referent) | 1.97 (1.29 – 3.01) | 2.10 (1.37 – 3.24) | 2.56 (1.67 – 3.93) |
|                                                 |        | P-value            | -               | 0.0016             | 0.0007             | <0.0001            |
|                                                 |        | N (cases/controls) | 63/111          | 116/111            | 119/111            | 146/111            |
| LPC C18:0                                       | MS     | Cut-point (μM)     | ≤21.4           | 21.4> to ≤24.4     | 24.4> to ≤28.5     | >28.5              |
|                                                 |        | OR (95% CI)        | 1.00 (referent) | 0.95 (0.64 – 1.39) | 1.30 (0.89 – 1.90) | 1.54 (1.07 – 2.22) |
|                                                 |        | P-value            | -               | 0.7722             | 0.1820             | 0.0206             |
|                                                 |        | N (cases/controls) | 93/111          | 87/111             | 119/111            | 145/111            |
| <b>Aggressive prostate cancer (40-60 years)</b> |        |                    |                 |                    |                    |                    |
| LPC C17:0                                       | MS     | Cut-point (μM)     | ≤1.26           | 1.26> to ≤1.53     | 1.53> to ≤1.85     | >1.85              |
|                                                 |        | OR (95% CI)        | 1.00 (referent) | 1.64 (0.80 – 3.38) | 2.69 (1.29 – 5.60) | 3.35 (1.66 – 6.76) |
|                                                 |        | P-value            | -               | 0.1719             | 0.0085             | 0.0008             |
|                                                 |        | N (cases/controls) | 22/43           | 33/42              | 50/42              | 64/42              |
| PC ae C38:3                                     | MS     | Cut-point (μM)     | ≤3.39           | 3.39> to ≤3.92     | 3.92> to ≤4.58     | >4.58              |
|                                                 |        | OR (95% CI)        | 1.00 (referent) | 1.54 (0.77 – 3.10) | 1.98 (0.96 – 4.12) | 2.52 (1.28 – 4.97) |
|                                                 |        | P-value            | -               | 0.2246             | 0.0665             | 0.0077             |
|                                                 |        | N (cases/controls) | 27/43           | 37/42              | 45/42              | 60/42              |
| PC ae C38:4                                     | MS     | Cut-point (μM)     | ≤9.65           | 9.65> to ≤11.3     | 11.3> to ≤13.0     | >13.0              |
|                                                 |        | OR (95% CI)        | 1.00 (referent) | 1.32 (0.68 – 2.56) | 1.70 (0.85 – 3.39) | 2.24 (1.17 – 4.29) |
|                                                 |        | P-value            | -               | 0.4135             | 0.1340             | 0.0147             |
|                                                 |        | N (cases/controls) | 29/43           | 36/42              | 44/42              | 60/42              |

**Additional file 4: Continued**

| Metabolite <sup>a, b</sup>                      | Method | Model              | 1st quartile    | 2st quartile       | 3rd quartile       | 4th quartile       |
|-------------------------------------------------|--------|--------------------|-----------------|--------------------|--------------------|--------------------|
| <b>Aggressive prostate cancer (40-60 years)</b> |        |                    |                 |                    |                    |                    |
| LPC C20:4                                       | MS     | Cut-point (μM)     | ≤3.69           | 3.69> to ≤4.43     | 4.43> to ≤5.46     | >5.46              |
|                                                 |        | OR (95% CI)        | 1.00 (referent) | 1.24 (0.59 – 2.59) | 1.98 (0.98 – 4.02) | 2.13 (1.08 – 4.23) |
|                                                 |        | P-value            | -               | 0.5673             | 0.0569             | 0.0300             |
|                                                 |        | N (cases/controls) | 30/43           | 32/42              | 51/42              | 56/42              |
| LPC C20:3                                       | MS     | Cut-point (μM)     | ≤1.59           | 1.59> to ≤1.92     | 1.92> to ≤2.32     | >2.32              |
|                                                 |        | OR (95% CI)        | 1.00 (referent) | 1.41 (0.76 – 2.61) | 1.97 (1.03 – 3.77) | 1.83 (0.96 – 3.48) |
|                                                 |        | P-value            | -               | 0.2828             | 0.0410             | 0.0652             |
|                                                 |        | N (cases/controls) | 28/43           | 40/42              | 52/42              | 49/42              |
| PC ac C40:2                                     | MS     | Cut-point (μM)     | ≤1.78           | 1.78> to ≤2.06     | 2.06> to ≤2.42     | >2.42              |
|                                                 |        | OR (95% CI)        | 1.00 (referent) | 1.02 (0.54 – 1.94) | 1.69 (0.90 – 3.18) | 1.85 (1.00 – 3.41) |
|                                                 |        | P-value            | -               | 0.9413             | 0.1053             | 0.0488             |
|                                                 |        | N (cases/controls) | 31/43           | 33/42              | 50/42              | 55/42              |
| C18:2                                           | MS     | Cut-point (μM)     | ≤0.035          | 0.035> to ≤0.042   | 0.042> to ≤0.051   | >0.051             |
|                                                 |        | OR (95% CI)        | 1.00 (referent) | 0.80 (0.46 – 1.40) | 0.48 (0.25 – 0.92) | 0.55 (0.30 – 1.00) |
|                                                 |        | P-value            | -               | 0.4212             | 0.0263             | 0.0494             |
|                                                 |        | N (cases/controls) | 60/43           | 47/42              | 30/42              | 32/42              |
| <b>Aggressive prostate cancer (60 years)</b>    |        |                    |                 |                    |                    |                    |
| LPC C17:0                                       | MS     | Cut-point (μM)     | ≤1.24           | 1.24> to ≤1.52     | 1.52> to ≤1.78     | >1.78              |
|                                                 |        | OR (95% CI)        | 1.00 (referent) | 1.63 (0.69 – 3.84) | 2.17 (0.92 – 5.15) | 3.90 (1.70 – 8.99) |
|                                                 |        | P-value            | -               | 0.2684             | 0.0776             | 0.0014             |
|                                                 |        | N (cases/controls) | 16/32           | 25/31              | 31/31              | 53/31              |

<sup>a</sup> All metabolites listed were significant after correction for multiple testing (FDR, 20%) based on  $p_{\text{crude}}$ -values in Additional file 3.

<sup>b</sup> Metabolites that were significant after Bonferroni correction based on  $p_{\text{crude}}$ -values in Additional file 3 are marked with (\*).
