# Supplementary material for: Identification of metabolites associated with prostate cancer risk: a nested case-control study with long follow-up in the Northern Sweden Health and Disease Study
Source: PubMed Central journal article supplement (PMC7376662; doi:10.1186/s12916-020-01655-1), 2020-07-23
Supplement: 12916_2020_1655_MOESM5_ESM.pdf [file 12916_2020_1655_MOESM5_ESM.pdf]

## Additional file 5: Differential associations by age group and disease type

| Metabolite                                                         | Group <sup>a</sup> | OR per doubling | (95% CI)      | P <sub>crude</sub> | N    | P <sub>interaction</sub> <sup>b</sup> |
|--------------------------------------------------------------------|--------------------|-----------------|---------------|--------------------|------|---------------------------------------|
| <b>Stratification by baseline age (overall prostate cancer)</b>    |                    |                 |               |                    |      |                                       |
| LPC C17:0                                                          | 40-50 years        | 1.10            | (0.73 – 1.66) | 0.6567             | 666  |                                       |
|                                                                    | 60 years*          | 2.08            | (1.45 – 2.98) | <0.0001*           | 777  | <0.0001*                              |
| LPC C18:0                                                          | 40-50 years        | 1.31            | (0.81 – 2.12) | 0.2791             | 666  |                                       |
|                                                                    | 60 years           | 1.83            | (1.22 – 2.75) | 0.0037*            | 777  | 0.0012*                               |
| Glycine                                                            | 40-50 years        | 2.11            | (1.21 – 3.69) | 0.0084*            | 652  |                                       |
|                                                                    | 60 years           | 0.68            | (0.41 – 1.14) | 0.1472             | 842  | <0.0001*                              |
| Pyruvate                                                           | 40-50 years        | 0.65            | (0.48 – 0.89) | 0.0066*            | 652  |                                       |
|                                                                    | 60 years           | 0.94            | (0.71 – 1.24) | 0.6512             | 842  | 0.2209                                |
| <b>Stratification by disease type (all ages at baseline)</b>       |                    |                 |               |                    |      |                                       |
| LPC C17:0                                                          | Non-aggressive     | 1.36            | (1.01 – 1.85) | 0.0454             | 1216 |                                       |
|                                                                    | Aggressive         | 2.67            | (1.48 – 4.83) | 0.0011*            | 338  | 0.0940                                |
| PC ae C38:3                                                        | Non-aggressive     | 1.09            | (0.76 – 1.57) | 0.6426             | 1216 |                                       |
|                                                                    | Aggressive         | 3.29            | (1.50 – 7.24) | 0.0030*            | 338  | 0.0458*                               |
| PC ae C38:4                                                        | Non-aggressive     | 1.24            | (0.84 – 1.83) | 0.2903             | 1216 |                                       |
|                                                                    | Aggressive         | 2.69            | (1.25 – 5.76) | 0.0110*            | 338  | 0.3957                                |
| LPC C20:4                                                          | Non-aggressive     | 1.28            | (0.95 – 1.74) | 0.1095             | 1216 |                                       |
|                                                                    | Aggressive         | 1.99            | (1.15 – 3.44) | 0.0142*            | 338  | 0.7617                                |
| LPC C20:3                                                          | Non-aggressive     | 1.15            | (0.85 – 1.56) | 0.3803             | 1216 |                                       |
|                                                                    | Aggressive         | 2.05            | (1.12 – 3.75) | 0.0206*            | 338  | 0.2258                                |
| PC ae C40:2                                                        | Non-aggressive     | 1.12            | (0.80 – 1.59) | 0.5079             | 1216 |                                       |
|                                                                    | Aggressive         | 2.49            | (1.25 – 4.97) | 0.0095*            | 338  | 0.7486                                |
| C18:2                                                              | Non-aggressive     | 1.01            | (0.78 – 1.32) | 0.9197             | 1216 |                                       |
|                                                                    | Aggressive         | 0.51            | (0.29 – 0.89) | 0.0167             | 338  | 0.2184                                |
| <b>Stratification by baseline age (aggressive prostate cancer)</b> |                    |                 |               |                    |      |                                       |
| LPC C17:0                                                          | 40-50 years        | 1.77            | (0.53 – 5.94) | 0.3579             | 88   |                                       |
|                                                                    | 60 years           | 3.02            | (1.52 – 6.01) | 0.0016             | 250  | 0.0794                                |

<sup>a</sup> Listed metabolites were significant after correction for multiple testing (FDR, 20%) according to p-values (p<sub>crude</sub>) from conditional logistic regression analyses using log<sub>2</sub> transformed metabolite data in one of the subgroups (Additional file 3). Associations significant after Bonferroni correction (for 148 independent tests; 0.05/148 = 0.000338) in the log<sub>2</sub>-based statistical analyses are indicated by (\*).

<sup>b</sup> Differential associations by age group or disease type were investigated for each of the listed metabolites using a Wald test, wherein regression coefficients in two subgroups were compared (for age: binary, 40-50, 60 years; for disease: binary, non-aggressive, aggressive). Differential associations were regarded as significant for p-values (p<sub>interaction</sub>) <0.05 as indicated by (\*).
