# Supplementary material for: Identification of metabolites associated with prostate cancer risk: a nested case-control study with long follow-up in the Northern Sweden Health and Disease Study
Source: PubMed Central journal article supplement (PMC7376662; doi:10.1186/s12916-020-01655-1), 2020-07-23
Supplement: 12916_2020_1655_MOESM6_ESM.pdf [file 12916_2020_1655_MOESM6_ESM.pdf]

**Additional file 6: Association with overall prostate cancer risk after stratification by follow up-time**

| Metabolite <sup>a, b</sup> | All subjects (n=1554) |          | Follow-up ≤10 years (n=800) |         | Follow-up >10 year (n=754) |         | Follow-up Pinteraction |
|----------------------------|-----------------------|----------|-----------------------------|---------|----------------------------|---------|------------------------|
|                            | OR (95% CI)           | Pcrude   | OR (95% CI)                 | Pcrude  | OR (95% CI)                | Pcrude  |                        |
| LPC C17:0                  | 1.59 (1.21 – 2.08)    | 0.0007** | 1.44<br>(1.00 – 2.07)       | 0.0501  | 1.77<br>(1.20 – 2.63)      | 0.0044* | 0.6952                 |
| LPC C18:0                  | 1.59 (1.17 – 2.18)    | 0.0034** | 1.65<br>(1.08 – 2.54)       | 0.0216* | 1.53<br>(0.97 – 2.41)      | 0.0666  | 0.9260                 |
| Glycine                    | 1.17 (0.81 – 1.69)    | 0.3943   | 1.26<br>(0.74 – 2.14)       | 0.3999  | 1.10<br>(0.67 – 1.82)      | 0.7057  | 0.1199                 |
| Pyruvate                   | 0.79 (0.65 – 0.96)    | 0.0185*  | 0.81<br>(0.60 – 1.11)       | 0.1844  | 0.77<br>(0.60 – 1.00)      | 0.0515  | 0.5685                 |
| PC ae C38:3                | 1.35 (0.97 – 1.87)    | 0.0765   | 1.10<br>(0.69 – 1.77)       | 0.6860  | 1.62<br>(1.02 – 2.56)      | 0.0402* | 0.3011                 |
| PC ae C38:4                | 1.47 (1.04 – 2.07)    | 0.0303*  | 1.35<br>(0.82 – 2.20)       | 0.2370  | 1.59<br>(0.98 – 2.59)      | 0.0613  | 0.2850                 |
| LPC C20:4                  | 1.43 (1.09 – 1.86)    | 0.0085*  | 1.42<br>(1.00 – 2.03)       | 0.0503  | 1.43<br>(0.96 – 2.13)      | 0.0791  | 0.3970                 |
| LPC C20:3                  | 1.30 (0.99 – 1.70)    | 0.0587   | 1.06<br>(0.75 – 1.51)       | 0.7418  | 1.71<br>(1.12 – 2.61)      | 0.0125* | 0.2139                 |
| PC ae C40:2                | 1.33 (0.98 – 1.81)    | 0.0676   | 1.51<br>(0.97 – 2.34)       | 0.0660  | 1.18<br>(0.77 – 1.81)      | 0.4554  | 0.1353                 |
| C18:2                      | 0.88 (0.70 – 1.12)    | 0.3082   | 0.95<br>(0.68 – 1.33)       | 0.7687  | 0.82<br>(0.59 – 1.15)      | 0.2531  | 0.9954                 |

<sup>a</sup> Only LPC C17:0 and LPC C18:0 were significant (FDR, 20%) when including all subjects (n<sub>MS</sub> =1554, n<sub>NMR</sub>=1494), while the other listed metabolites were significant in subgroups stratified by baseline age and/or disease type.

<sup>b</sup> Note that missing NMR data for some subjects resulted in smaller subgroups for glycine and pyruvate (n<sub>≤10</sub> =766, n<sub>>10</sub> =728).
