# Supplementary material for: Identification of metabolites associated with prostate cancer risk: a nested case-control study with long follow-up in the Northern Sweden Health and Disease Study
Source: PubMed Central journal article supplement (PMC7376662; doi:10.1186/s12916-020-01655-1), 2020-07-23
Supplement: 12916_2020_1655_MOESM7_ESM.pdf [file 12916_2020_1655_MOESM7_ESM.pdf]

**Additional file 7: Adjusting for the sum of lysophosphatidylcholines with  $\leq 20$  carbons**

| Metabolite                                            | Crude model <sup>a</sup>     |                                 | Adjusted model                  |                                    |
|-------------------------------------------------------|------------------------------|---------------------------------|---------------------------------|------------------------------------|
|                                                       | OR <sub>crude</sub> (95% CI) | P <sub>crude</sub> <sup>b</sup> | OR <sub>adjusted</sub> (95% CI) | P <sub>adjusted</sub> <sup>b</sup> |
| <b>Overall prostate cancer (40-60 years)</b>          |                              |                                 |                                 |                                    |
| LPCs $\Sigma(x \leq 20)$                              | 1.54 (1.11 – 2.14)           | 0.0106*                         | -                               | -                                  |
| LPC C14:0                                             | 1.11 (0.77 – 1.62)           | 0.5753                          | 0.74 (0.46 – 1.19)              | 0.2089                             |
| LPC C16:0                                             | 1.50 (1.09 – 2.07)           | 0.0122*                         | 1.11 (0.33 – 3.67)              | 0.8672                             |
| LPC C16:1                                             | 1.08 (0.84 – 1.38)           | 0.5675                          | 0.68 (0.47 – 0.99)              | 0.0441*                            |
| LPC C17:0                                             | 1.59 (1.21 – 2.08)           | 0.0007*                         | 1.58 (1.06 – 2.36)              | 0.0252*                            |
| LPC C18:0                                             | 1.59 (1.17 – 2.18)           | 0.0034*                         | 1.66 (0.84 – 3.27)              | 0.1439                             |
| LPC C18:1                                             | 1.39 (1.04 – 1.87)           | 0.0270*                         | 0.92 (0.47 – 1.82)              | 0.8142                             |
| LPC C18:2                                             | 1.19 (0.94 – 1.50)           | 0.1486                          | 0.84 (0.58 – 1.23)              | 0.3728                             |
| LPC C20:3                                             | 1.30 (0.99 – 1.70)           | 0.0587                          | 1.04 (0.72 – 1.50)              | 0.8357                             |
| LPC C20:4                                             | 1.43 (1.09 – 1.86)           | 0.0085*                         | 1.25 (0.84 – 1.85)              | 0.2743                             |
| <b>Overall prostate cancer (40-50 years)</b>          |                              |                                 |                                 |                                    |
| LPC $\Sigma(x \leq 20)$                               | 1.30 (0.79 – 2.17)           | 0.3044                          | -                               | -                                  |
| LPC C14:0                                             | 0.98 (0.56 – 1.72)           | 0.9523                          | 0.74 (0.36 – 1.49)              | 0.3916                             |
| LPC C16:0                                             | 1.36 (0.83 – 2.22)           | 0.2252                          | 2.31 (0.34 – 15.5)              | 0.3900                             |
| LPC C16:1                                             | 0.91 (0.63 – 1.32)           | 0.6318                          | 0.61 (0.35 – 1.05)              | 0.0738                             |
| LPC C17:0                                             | 1.10 (0.73 – 1.66)           | 0.6567                          | 0.81 (0.42 – 1.59)              | 0.5481                             |
| LPC C18:0                                             | 1.31 (0.81 – 2.12)           | 0.2791                          | 1.22 (0.44 – 3.37)              | 0.7062                             |
| LPC C18:1                                             | 1.22 (0.78 – 1.90)           | 0.3924                          | 0.91 (0.31 – 2.61)              | 0.8535                             |
| LPC C18:2                                             | 1.05 (0.74 – 1.50)           | 0.7705                          | 0.77 (0.43 – 1.38)              | 0.3819                             |
| LPC C20:3                                             | 1.18 (0.77 – 1.82)           | 0.4484                          | 1.03 (0.58 – 1.83)              | 0.9127                             |
| LPC C20:4                                             | 1.25 (0.83 – 1.86)           | 0.2854                          | 1.15 (0.62 – 2.13)              | 0.6557                             |
| <b>Overall prostate cancer (60 years)</b>             |                              |                                 |                                 |                                    |
| LPC $\Sigma(x \leq 20)$                               | 1.74 (1.12 – 2.69)           | 0.0133*                         | -                               | -                                  |
| LPC C14:0                                             | 1.23 (0.74 – 2.05)           | 0.4182                          | 0.74 (0.39 – 1.42)              | 0.3703                             |
| LPC C16:0                                             | 1.62 (1.06 – 2.45)           | 0.0243*                         | 0.67 (0.14 – 3.14)              | 0.6102                             |
| LPC C16:1                                             | 1.23 (0.88 – 1.73)           | 0.2244                          | 0.76 (0.45 – 1.28)              | 0.2955                             |
| LPC C17:0                                             | 2.08 (1.45 – 2.98)           | <0.0001*                        | 2.33 (1.39 – 3.9)               | 0.0013*                            |
| LPC C18:0                                             | 1.83 (1.22 – 2.75)           | 0.0037*                         | 2.08 (0.83 – 5.2)               | 0.1163                             |
| LPC C18:1                                             | 1.54 (1.05 – 2.28)           | 0.0293*                         | 0.94 (0.39 – 2.3)               | 0.8992                             |
| LPC C18:2                                             | 1.31 (0.96 – 1.80)           | 0.0943                          | 0.91 (0.56 – 1.49)              | 0.7099                             |
| LPC C20:3                                             | 1.38 (0.97 – 1.95)           | 0.0699                          | 1.03 (0.64 – 1.67)              | 0.9033                             |
| LPC C20:4                                             | 1.58 (1.11 – 2.24)           | 0.0109*                         | 1.33 (0.79 – 2.23)              | 0.2821                             |
| <b>Non-aggressive prostate cancer (40-60 years)</b>   |                              |                                 |                                 |                                    |
| LPC $\Sigma(x \leq 20)$                               | 1.41 (0.97 – 2.05)           | 0.0732                          | -                               | -                                  |
| LPC C14:0                                             | 0.95 (0.63 – 1.44)           | 0.8058                          | 0.63 (0.37 – 1.07)              | 0.0876                             |
| LPC C16:0                                             | 1.39 (0.97 – 1.99)           | 0.0764                          | 1.13 (0.30 – 4.29)              | 0.8605                             |
| LPC C16:1                                             | 0.97 (0.74 – 1.28)           | 0.8474                          | 0.61 (0.40 – 0.93)              | 0.0220*                            |
| LPC C17:0                                             | 1.36 (1.01 – 1.85)           | 0.0454*                         | 1.26 (0.80 – 1.98)              | 0.3126                             |
| LPC C18:0                                             | 1.49 (1.05 – 2.12)           | 0.0256*                         | 1.73 (0.81 – 3.70)              | 0.1592                             |
| LPC C18:1                                             | 1.35 (0.97 – 1.87)           | 0.0787                          | 1.14 (0.53 – 2.45)              | 0.7413                             |
| LPC C18:2                                             | 1.13 (0.87 – 1.47)           | 0.3486                          | 0.86 (0.57 – 1.30)              | 0.4819                             |
| LPC C20:3                                             | 1.15 (0.85 – 1.56)           | 0.3803                          | 0.90 (0.59 – 1.37)              | 0.6333                             |
| LPC C20:4                                             | 1.28 (0.95 – 1.74)           | 0.1095                          | 1.10 (0.71 – 1.72)              | 0.6718                             |
| <b>Non-aggressive prostate cancer (40 – 50 years)</b> |                              |                                 |                                 |                                    |
| LPC $\Sigma(x \leq 20)$                               | 1.26 (0.73 – 2.17)           | 0.4117                          | -                               | -                                  |
| LPC C14:0                                             | 0.90 (0.50 – 1.63)           | 0.7345                          | 0.66 (0.31 – 1.41)              | 0.2845                             |
| LPC C16:0                                             | 1.32 (0.77 – 2.26)           | 0.3073                          | 2.55 (0.32 – 20.3)              | 0.3754                             |
| LPC C16:1                                             | 0.87 (0.59 – 1.27)           | 0.4668                          | 0.55 (0.31 – 0.99)              | 0.0463*                            |
| LPC C17:0                                             | 1.03 (0.67 – 1.60)           | 0.8951                          | 0.74 (0.37 – 1.51)              | 0.4102                             |
| LPC C18:0                                             | 1.24 (0.73 – 2.09)           | 0.4280                          | 1.09 (0.36 – 3.27)              | 0.8827                             |
| LPC C18:1                                             | 1.21 (0.75 – 1.94)           | 0.4349                          | 1.05 (0.33 – 3.31)              | 0.9371                             |
| LPC C18:2                                             | 1.02 (0.70 – 1.50)           | 0.9020                          | 0.76 (0.40 – 1.42)              | 0.3822                             |
| LPC C20:3                                             | 1.14 (0.72 – 1.81)           | 0.5722                          | 1.01 (0.55 – 1.86)              | 0.9722                             |
| LPC C20:4                                             | 1.24 (0.81 – 1.92)           | 0.3256                          | 1.20 (0.63 – 2.31)              | 0.5772                             |

**Supplementary Table S4: (Continued)**

| Metabolite                                       | Crude model <sup>a</sup>     |                                 | Adjusted model                  |                                    |
|--------------------------------------------------|------------------------------|---------------------------------|---------------------------------|------------------------------------|
|                                                  | OR <sub>crude</sub> (95% CI) | p <sub>crude</sub> <sup>b</sup> | OR <sub>adjusted</sub> (95% CI) | p <sub>adjusted</sub> <sup>b</sup> |
| <b>Non-aggressive prostate cancer (60 years)</b> |                              |                                 |                                 |                                    |
| LPC Σ(x ≤20)                                     | 1.55 (0.93 – 2.60)           | 0.0926                          | -                               | -                                  |
| LPC C14:0                                        | 1.00 (0.55 – 1.80)           | 0.9931                          | 0.60 (0.28 – 1.28)              | 0.1850                             |
| LPC C16:0                                        | 1.44 (0.89 – 2.34)           | 0.1426                          | 0.61 (0.10 – 3.54)              | 0.5801                             |
| LPC C16:1                                        | 1.10 (0.74 – 1.65)           | 0.6290                          | 0.69 (0.38 – 1.27)              | 0.2373                             |
| LPC C17:0                                        | 1.77 (1.15 – 2.72)           | 0.0089*                         | 1.87 (1.02 – 3.40)              | 0.0417*                            |
| LPC C18:0                                        | 1.75 (1.08 – 2.81)           | 0.0225*                         | 2.60 (0.90 – 7.55)              | 0.0782                             |
| LPC C18:1                                        | 1.49 (0.94 – 2.37)           | 0.0909                          | 1.25 (0.45 – 3.50)              | 0.6746                             |
| LPC C18:2                                        | 1.24 (0.87 – 1.79)           | 0.2397                          | 0.96 (0.56 – 1.67)              | 0.8909                             |
| LPC C20:3                                        | 1.15 (0.76 – 1.73)           | 0.5016                          | 0.81 (0.45 – 1.44)              | 0.4632                             |
| LPC C20:4                                        | 1.32 (0.86 – 2.02)           | 0.2017                          | 1.03 (0.56 – 1.89)              | 0.9248                             |
| <b>Aggressive prostate cancer (40-60 years)</b>  |                              |                                 |                                 |                                    |
| LPCs Σ(x ≤20)                                    | 2.11 (1.03 – 4.32)           | 0.0409*                         | -                               | -                                  |
| LPC C14:0                                        | 2.29 (0.93 – 5.61)           | 0.0714                          | 1.53 (0.51 – 4.57)              | 0.4439                             |
| LPC C16:0                                        | 2.01 (1.01 – 3.99)           | 0.0475*                         | 1.01 (0.07 – 15.1)              | 0.9960                             |
| LPC C16:1                                        | 1.62 (0.92 – 2.86)           | 0.0970                          | 1.09 (0.46 – 2.53)              | 0.8511                             |
| LPC C17:0                                        | 2.67 (1.48 – 4.83)           | 0.0011*                         | 3.59 (1.43 – 9.03)              | 0.0065*                            |
| LPC C18:0                                        | 2.01 (1.02 – 3.94)           | 0.0426*                         | 1.41 (0.31 – 6.31)              | 0.6572                             |
| LPC C18:1                                        | 1.57 (0.84 – 2.95)           | 0.1611                          | 0.42 (0.09 – 1.88)              | 0.2558                             |
| LPC C18:2                                        | 1.44 (0.85 – 2.46)           | 0.1780                          | 0.76 (0.31 – 1.91)              | 0.5613                             |
| LPC C20:3                                        | 2.05 (1.12 – 3.75)           | 0.0206*                         | 1.72 (0.77 – 3.80)              | 0.1844                             |
| LPC C20:4                                        | 1.99 (1.15 – 3.44)           | 0.0142*                         | 1.89 (0.78 – 4.56)              | 0.1580                             |
| <b>Aggressive prostate cancer (40-50 years)</b>  |                              |                                 |                                 |                                    |
| LPC Σ(x ≤20)                                     | 1.63 (0.42 – 6.39)           | 0.4817                          | -                               | -                                  |
| LPC C14:0                                        | 2.16 (0.35 – 13.3)           | 0.4068                          | 1.80 (0.21 – 15.4)              | 0.5903                             |
| LPC C16:0                                        | 1.58 (0.44 – 5.71)           | 0.4850                          | 1.19 (0.01 – 164)               | 0.9439                             |
| LPC C16:1                                        | 1.64 (0.45 – 6.02)           | 0.4532                          | 1.40 (0.27 – 7.37)              | 0.6905                             |
| LPC C17:0                                        | 1.77 (0.53 – 5.94)           | 0.3579                          | 1.99 (0.22 – 18.1)              | 0.5423                             |
| LPC C18:0                                        | 1.83 (0.50 – 6.74)           | 0.3659                          | 2.35 (0.16 – 35.0)              | 0.5362                             |
| LPC C18:1                                        | 1.27 (0.34 – 4.79)           | 0.7216                          | 0.42 (0.02 – 7.50)              | 0.5557                             |
| LPC C18:2                                        | 1.25 (0.49 – 3.17)           | 0.6413                          | 0.87 (0.18 – 4.20)              | 0.8567                             |
| LPC C20:3                                        | 1.53 (0.43 – 5.48)           | 0.5157                          | 1.24 (0.23 – 6.72)              | 0.8036                             |
| LPC C20:4                                        | 1.26 (0.43 – 3.65)           | 0.6755                          | 0.77 (0.12 – 4.87)              | 0.7842                             |
| <b>Aggressive prostate cancer (60 years)</b>     |                              |                                 |                                 |                                    |
| LPC Σ(x ≤20)                                     | 2.32 (1.00 – 5.38)           | 0.0500                          | -                               | -                                  |
| LPC C14:0                                        | 2.33 (0.83 – 6.54)           | 0.1091                          | 1.43 (0.40 – 5.12)              | 0.5839                             |
| LPC C16:0                                        | 2.20 (0.97 – 4.97)           | 0.0579                          | 0.97 (0.04 – 24.8)              | 0.9858                             |
| LPC C16:1                                        | 1.61 (0.86 – 3.04)           | 0.1387                          | 0.94 (0.34 – 2.60)              | 0.9063                             |
| LPC C17:0                                        | 3.02 (1.52 – 6.01)           | 0.0016*                         | 4.06 (1.46 – 11.3)              | 0.0075*                            |
| LPC C18:0                                        | 2.08 (0.95 – 4.56)           | 0.0684                          | 1.10 (0.18 – 6.72)              | 0.9191                             |
| LPC C18:1                                        | 1.67 (0.81 – 3.41)           | 0.1624                          | 0.38 (0.06 – 2.29)              | 0.2915                             |
| LPC C18:2                                        | 1.54 (0.81 – 2.95)           | 0.1890                          | 0.73 (0.24 – 2.26)              | 0.5842                             |
| LPC C20:3                                        | 2.21 (1.11 – 4.40)           | 0.0233*                         | 1.85 (0.75 – 4.56)              | 0.1793                             |
| LPC C20:4                                        | 2.33 (1.22 – 4.45)           | 0.0105*                         | 2.45 (0.89 – 6.76)              | 0.0826                             |

<sup>a</sup> The results for the individual LPCs (crude models) are also presented in Additional file 3.

<sup>b</sup> Metabolites with nominal p-value <0.05 are marked with (\*).
