# Supplementary material for: Identification of metabolites associated with prostate cancer risk: a nested case-control study with long follow-up in the Northern Sweden Health and Disease Study
Source: PubMed Central journal article supplement (PMC7376662; doi:10.1186/s12916-020-01655-1), 2020-07-23
Supplement: 12916_2020_1655_MOESM8_ESM.pdf [file 12916_2020_1655_MOESM8_ESM.pdf]

**Additional file 8: Correlation of lysophosphatidylcholines with dietary fatty acids**

| <b>Cx:y<sup>a</sup></b> | <b>Correlation</b> | <b>p-value</b> |
|-------------------------|--------------------|----------------|
| C14:0                   | 0.10               | <0.0001        |
| C16:0                   | -0.02              | 0.5020         |
| C17:0                   | 0.19               | <0.0001        |
| C18:2                   | -0.02              | 0.4552         |
| C20:4                   | 0.04               | 0.1020         |

<sup>a</sup> The spearman correlation coefficients (and p-values) were derived based on values in case-controls with a full dietary fatty acid profile (n = 1524).
