# Supplementary material for: Identification of metabolites associated with prostate cancer risk: a nested case-control study with long follow-up in the Northern Sweden Health and Disease Study
Source: PubMed Central journal article supplement (PMC7376662; doi:10.1186/s12916-020-01655-1), 2020-07-23
Supplement: 12916_2020_1655_MOESM9_ESM.pdf [file 12916_2020_1655_MOESM9_ESM.pdf]

## Additional file 9: Status of glucose metabolism and prostate cancer risk

|                                                                  | NGT <sup>a</sup> | IGT <sup>a</sup>   | IFG <sup>a</sup>   | T2D <sup>a,b</sup> | Missing |
|------------------------------------------------------------------|------------------|--------------------|--------------------|--------------------|---------|
| <b>Overall prostate cancer (40-60 years) <sup>c</sup></b>        |                  |                    |                    |                    |         |
| Cases (N)                                                        | 580              | 93                 | 70                 | 31                 | 3       |
| Controls (N)                                                     | 541              | 138                | 67                 | 27                 | 4       |
| OR (95% CI)                                                      | 1.00 (referent)  | 0.63 (0.47 – 0.85) | 0.95 (0.65 – 1.37) | 1.02 (0.59 – 1.76) |         |
| p-value <sup>d</sup>                                             | –                | 0.0024*            | 0.7659             | 0.9443             |         |
| <b>Overall prostate cancer (40-50 years) <sup>c</sup></b>        |                  |                    |                    |                    |         |
| Cases (N)                                                        | 272              | 23                 | 27                 | 10                 | 1       |
| Controls (N)                                                     | 255              | 46                 | 26                 | 5                  | 1       |
| OR (95% CI)                                                      | 1.00 (referent)  | 0.44 (0.25 – 0.77) | 0.90 (0.49 – 1.67) | 1.91 (0.65 – 5.61) |         |
| p-value <sup>d</sup>                                             | –                | 0.0039*            | 0.7443             | 0.2399             |         |
| <b>Overall prostate cancer (60 years) <sup>c</sup></b>           |                  |                    |                    |                    |         |
| Cases (N)                                                        | 308              | 70                 | 43                 | 21                 | 2       |
| Controls (N)                                                     | 286              | 92                 | 41                 | 22                 | 3       |
| OR (95% CI)                                                      | 1.00 (referent)  | 0.73 (0.51 – 1.04) | 0.97 (0.61 – 1.54) | 0.83 (0.61 – 1.58) |         |
| p-value <sup>d</sup>                                             | –                | 0.0781             | 0.8891             | 0.5651             |         |
| <b>Non-aggressive prostate cancer (40-60 years) <sup>c</sup></b> |                  |                    |                    |                    |         |
| Cases (N)                                                        | 453              | 77                 | 52                 | 24                 | 2       |
| Controls (N)                                                     | 434              | 108                | 46                 | 18                 | 2       |
| OR (95% CI)                                                      | 1.00 (referent)  | 0.69 (0.49 – 0.95) | 1.04 (0.67 – 1.59) | 1.29 (0.67 – 2.46) |         |
| p-value <sup>d</sup>                                             | –                | 0.0248*            | 0.8737             | 0.4480             |         |
| <b>Non-aggressive prostate cancer (40-50 years) <sup>c</sup></b> |                  |                    |                    |                    |         |
| Cases (N)                                                        | 234              | 21                 | 24                 | 9                  | 1       |
| Controls (N)                                                     | 224              | 41                 | 21                 | 2                  | 1       |
| OR (95% CI)                                                      | 1.00 (referent)  | 0.44 (0.24 – 0.81) | 0.97 (0.52 – 1.90) | 4.5 (0.97 – 20.8)  |         |
| p-value <sup>d</sup>                                             | –                | 0.0077*            | 0.9899             | 0.0544             |         |
| <b>Non-aggressive prostate cancer (60 years) <sup>c</sup></b>    |                  |                    |                    |                    |         |
| Cases (N)                                                        | 219              | 56                 | 28                 | 15                 | 1       |
| Controls (N)                                                     | 210              | 67                 | 25                 | 16                 | 1       |
| OR (95% CI)                                                      | 1.00 (referent)  | 0.82 (0.55 – 1.23) | 1.06 (0.60 – 1.89) | 0.88 (0.41 – 1.89) |         |
| p-value <sup>d</sup>                                             | –                | 0.3415             | 0.8414             | 0.7480             |         |
| <b>Aggressive prostate cancer (40-60 years) <sup>c</sup></b>     |                  |                    |                    |                    |         |
| Cases (N)                                                        | 127              | 16                 | 18                 | 7                  | 1       |
| Controls (N)                                                     | 107              | 30                 | 21                 | 9                  | 2       |
| OR (95% CI)                                                      | 1.00 (referent)  | 0.47 (0.24 – 0.91) | 0.72 (0.34 – 1.51) | 0.53 (0.18 – 1.53) |         |
| p-value <sup>d</sup>                                             | –                | 0.0256*            | 0.3789             | 0.2410             |         |
| <b>Aggressive prostate cancer (40-50 years) <sup>c</sup></b>     |                  |                    |                    |                    |         |
| Cases (N)                                                        | 38               | 2                  | 3                  | 1                  | 0       |
| Controls (N)                                                     | 31               | 5                  | 5                  | 3                  | 0       |
| OR (95% CI)                                                      | 1.00 (referent)  | 0.31 (0.05 – 1.81) | 0.33 (0.04 – 3.21) | 0.24 (0.02 – 2.61) |         |
| p-value <sup>d</sup>                                             | –                | 0.1939             | 0.3414             | 0.2386             |         |
| <b>Aggressive prostate cancer (60 years) <sup>c</sup></b>        |                  |                    |                    |                    |         |
| Cases (N)                                                        | 89               | 14                 | 15                 | 6                  | 1       |
| Controls (N)                                                     | 76               | 25                 | 16                 | 6                  | 2       |
| OR (95% CI)                                                      | 1.00 (referent)  | 0.51 (0.25 – 1.06) | 0.82 (0.37 – 1.82) | 0.68 (0.20 – 2.31) |         |
| p-value <sup>d</sup>                                             | –                | 0.0709             | 0.6228             | 0.5371             |         |

<sup>a</sup> NGT if glucose (0h) <6.1 mmol/L, IGT if glucose (0h) <7.0 and (2h) <7.8 mmol/L, IFG if glucose (0h) ≥6.1, <7.0mmol/L, T2D if glucose (0h) ≥7.0 or (2h) ≥11.1 mmol/L.

<sup>b</sup> Individuals with diagnosed diabetes when enrolled to the NSHDS were not included in the present study.

<sup>c</sup> **Stratifications:** overall prostate cancer (40-60 years, n = 770 pairs; 40-50 years, n = 331 pairs; 60 years, n = 439 pairs), non-aggressive prostate cancer (40-60 years, n = 604 pairs; 40-50 years, n = 287; 60 years, n = 317 pairs), aggressive prostate cancer (40-60 years, n = 166 pairs; 40-50 years, n = 44 pairs; 60 years, n = 122 pairs). Note that the small sample size in some subgroups yields uncertain risk estimates.

<sup>d</sup> p-values <0.05 are indicated with (\*).
