# Supplementary material for: Identification of metabolites associated with prostate cancer risk: a nested case-control study with long follow-up in the Northern Sweden Health and Disease Study
Source: PubMed Central journal article supplement (PMC7376662; doi:10.1186/s12916-020-01655-1), 2020-07-23
Supplement: 12916_2020_1655_MOESM10_ESM.pdf [file 12916_2020_1655_MOESM10_ESM.pdf]

**Additional file 10: Prostate cancer risk in case-controls with normal glucose tolerance**

| Metabolite                                                      | OR <sub>NGT</sub> (95% CI) | p <sub>NGT</sub> <sup>a</sup> | ΔOR <sup>b</sup> | Δp <sup>b</sup> |
|-----------------------------------------------------------------|----------------------------|-------------------------------|------------------|-----------------|
| <b>Overall prostate cancer (40-60 years)<sup>c</sup></b>        |                            |                               |                  |                 |
| LPC C17:0                                                       | 1.91 (1.28 – 2.86)         | 0.0016*                       | +0.33            | +0.001          |
| LPC C18:0                                                       | 2.22 (1.39 – 3.53)         | 0.0008*                       | +0.63            | -0.003          |
| Glycine                                                         | 1.29 (0.78 – 2.13)         | 0.3167                        | +0.12            | -0.078          |
| Pyruvate                                                        | 0.96 (0.73 – 1.25)         | 0.7638                        | +0.17            | +0.745          |
| PC ae C38:3                                                     | 1.93 (1.17 – 3.18)         | 0.0098*                       | +0.59            | -0.067          |
| PC ae C38:4                                                     | 1.85 (1.10 – 3.09)         | 0.0198*                       | +0.38            | -0.011          |
| LPC C20:3                                                       | 1.62 (1.09 – 2.42)         | 0.0176*                       | +0.33            | -0.041          |
| LPC C20:4                                                       | 1.60 (1.08 – 2.37)         | 0.0196*                       | +0.17            | +0.011          |
| PC ae C40:2                                                     | 1.66 (1.06 – 2.60)         | 0.0282*                       | +0.33            | -0.039          |
| C18:2                                                           | 0.89 (0.63 – 1.25)         | 0.4891                        | ±0.00            | +0.181          |
| <b>Overall prostate cancer (40-50 years)<sup>c</sup></b>        |                            |                               |                  |                 |
| LPC C17:0                                                       | 1.76 (0.92 – 3.44)         | 0.0888                        | +0.68            | -0.568          |
| LPC C18:0                                                       | 2.26 (1.07 – 4.78)         | 0.0336*                       | +0.95            | -0.246          |
| Glycine                                                         | 2.22 (1.11 – 4.46)         | 0.0251*                       | +0.11            | +0.017          |
| Pyruvate                                                        | 0.84 (0.58 – 1.22)         | 0.3662                        | +0.19            | +0.360          |
| PC ae C38:3                                                     | 1.31 (0.60 – 2.84)         | 0.4999                        | +0.13            | -0.013          |
| PC ae C38:4                                                     | 1.50 (0.66 – 3.40)         | 0.3374                        | +0.09            | +0.126          |
| LPC C20:3                                                       | 1.34 (0.71 – 2.55)         | 0.3669                        | +0.16            | -0.082          |
| LPC C20:4                                                       | 1.72 (0.92 – 3.21)         | 0.0875                        | +0.48            | -0.198          |
| PC ae C40:2                                                     | 1.74 (0.86 – 3.52)         | 0.1206                        | +0.60            | -0.462          |
| C18:2                                                           | 0.93 (0.56 – 1.52)         | 0.7618                        | +0.03            | +0.201          |
| <b>Overall prostate cancer (60 years)<sup>c</sup></b>           |                            |                               |                  |                 |
| LPC C17:0                                                       | 3.14 (1.72 – 5.73)         | 0.0002*                       | +1.07            | ±0.000          |
| LPC C18:0                                                       | 3.19 (1.60 – 6.36)         | 0.0010*                       | +1.36            | -0.003          |
| Glycine                                                         | 0.58 (0.26 – 1.32)         | 0.1949                        | -0.10            | +0.048          |
| Pyruvate                                                        | 1.14 (0.75 – 1.72)         | 0.5494                        | +0.20            | -0.102          |
| PC ae C38:3                                                     | 3.28 (1.54 – 6.98)         | 0.0020*                       | +1.80            | -0.074          |
| PC ae C38:4                                                     | 2.73 (1.30 – 5.72)         | 0.0079*                       | +1.22            | -0.067          |
| LPC C20:3                                                       | 1.94 (1.11 – 3.39)         | 0.0203*                       | +0.56            | -0.050          |
| LPC C20:4                                                       | 1.84 (1.04 – 3.26)         | 0.0349*                       | +0.27            | +0.024          |
| PC ae C40:2                                                     | 2.20 (1.13 – 4.27)         | 0.0199*                       | +0.71            | -0.034          |
| C18:2                                                           | 0.92 (0.55 – 1.53)         | 0.7454                        | +0.05            | +0.348          |
| <b>Non-aggressive prostate cancer (40-60 years)<sup>c</sup></b> |                            |                               |                  |                 |
| LPC C17:0                                                       | 1.79 (1.14 – 2.81)         | 0.0114*                       | +0.43            | -0.034          |
| LPC C18:0                                                       | 2.12 (1.26 – 3.59)         | 0.0048*                       | +0.63            | -0.021          |
| Glycine                                                         | 1.52 (0.86 – 2.70)         | 0.1504                        | +0.41            | -0.709          |
| Pyruvate                                                        | 0.87 (0.65 – 1.17)         | 0.3526                        | +0.11            | +0.335          |
| PC ae C38:3                                                     | 1.56 (0.90 – 2.70)         | 0.1121                        | +0.47            | -0.531          |
| PC ae C38:4                                                     | 1.50 (0.84 – 2.67)         | 0.1745                        | +0.26            | -0.116          |
| LPC C20:3                                                       | 1.41 (0.89 – 2.21)         | 0.1425                        | +0.26            | -0.238          |
| LPC C20:4                                                       | 1.46 (0.93 – 2.29)         | 0.1015                        | +0.18            | -0.008          |
| PC ae C40:2                                                     | 1.52 (0.91 – 2.54)         | 0.1095                        | +0.40            | -0.398          |
| C18:2                                                           | 1.01 (0.69 – 1.47)         | 0.9718                        | -0.01            | +0.052          |
| <b>Non-aggressive prostate cancer (40-50 years)<sup>c</sup></b> |                            |                               |                  |                 |
| LPC C17:0                                                       | 1.20 (0.66 – 2.19)         | 0.5567                        | +0.17            | -0.338          |
| LPC C18:0                                                       | 1.63 (0.81 – 3.30)         | 0.1721                        | +0.40            | -0.256          |
| Glycine                                                         | 2.22 (1.07 – 4.61)         | 0.0321*                       | +0.21            | +0.014          |
| Pyruvate                                                        | 0.80 (0.54 – 1.20)         | 0.2796                        | +0.16            | +0.272          |
| PC ae C38:3                                                     | 0.96 (0.48 – 1.97)         | 0.9133                        | -0.07            | -0.004          |
| PC ae C38:4                                                     | 1.09 (0.49 – 2.40)         | 0.8372                        | -0.24            | +0.500          |
| LPC C20:3                                                       | 1.21 (0.65 – 2.27)         | 0.5512                        | +0.07            | -0.021          |
| LPC C20:4                                                       | 1.43 (0.79 – 2.59)         | 0.2421                        | +0.18            | -0.084          |
| PC ae C40:2                                                     | 1.19 (0.62 – 2.29)         | 0.6019                        | +0.15            | -0.264          |
| C18:2                                                           | 0.96 (0.59 – 1.55)         | 0.8569                        | -0.02            | -0.042          |

**Additional file 10: (Continued)**

| Metabolite                                                   | OR <sub>NGT</sub> (95% CI) | p <sub>NGT</sub> <sup>a</sup> | ΔOR <sup>b</sup> | Δp <sup>b</sup> |
|--------------------------------------------------------------|----------------------------|-------------------------------|------------------|-----------------|
| <b>Non-aggressive prostate cancer (60 years)<sup>c</sup></b> |                            |                               |                  |                 |
| LPC C17:0                                                    | 2.92 (1.45 – 5.88)         | 0.0027*                       | +1.15            | -0.006          |
| LPC C18:0                                                    | 2.90 (1.32 – 6.38)         | 0.0081*                       | +1.16            | -0.014          |
| Glycine                                                      | 0.66 (0.23 – 1.90)         | 0.4420                        | -0.11            | +0.015          |
| Pyruvate                                                     | 0.97 (0.62 – 1.54)         | 0.9102                        | +0.04            | +0.216          |
| PC ae C38:3                                                  | 3.07 (1.26 – 7.49)         | 0.0136*                       | +1.92            | -0.573          |
| PC ae C38:4                                                  | 2.16 (0.91 – 5.12)         | 0.0821                        | +0.99            | -0.497          |
| LPC C20:3                                                    | 1.65 (0.85 – 3.20)         | 0.1367                        | +0.50            | -0.365          |
| LPC C20:4                                                    | 1.50 (0.75 – 2.99)         | 0.2497                        | +0.18            | +0.048          |
| PC ae C40:2                                                  | 2.22 (0.96 – 5.14)         | 0.0618                        | +1.02            | -0.384          |
| C18:2                                                        | 1.09 (0.60 – 2.00)         | 0.7775                        | +0.04            | -0.010          |
| <b>Aggressive prostate cancer (40-60 years)<sup>c</sup></b>  |                            |                               |                  |                 |
| LPC C17:0                                                    | 2.45 (1.00 – 6.06)         | 0.0511                        | -0.21            | +0.050          |
| LPC C18:0                                                    | 2.61 (0.94 – 7.24)         | 0.0661                        | +0.60            | +0.024          |
| Glycine                                                      | 0.71 (0.24 – 2.11)         | 0.5384                        | -0.06            | +0.021          |
| Pyruvate                                                     | 1.90 (0.86 – 4.22)         | 0.1124                        | +1.00            | -0.559          |
| PC ae C38:3                                                  | 4.98 (1.43 – 17.4)         | 0.0119*                       | +1.69            | +0.009          |
| PC ae C38:4                                                  | 4.01 (1.24 – 17.4)         | 0.0202*                       | +1.32            | +0.009          |
| LPC C20:3                                                    | 2.70 (1.09 – 6.66)         | 0.0314*                       | +0.65            | +0.011          |
| LPC C20:4                                                    | 2.15 (0.94 – 4.89)         | 0.0688                        | +0.16            | +0.055          |
| PC ae C40:2                                                  | 2.20 (0.85 – 5.69)         | 0.1039                        | -0.29            | +0.094          |
| C18:2                                                        | 0.47 (0.20 – 1.13)         | 0.0919                        | -0.04            | +0.075          |
| <b>Aggressive prostate cancer (40-50 years)<sup>c</sup></b>  |                            |                               |                  |                 |
| LPC C17:0                                                    | 1.02 (0.21 – 4.79)         | 0.9880                        | -0.75            | +0.630          |
| LPC C18:0                                                    | 1.44 (0.34 – 6.13)         | 0.6200                        | -0.38            | +0.254          |
| Glycine                                                      | 2.20 (0.21 – 23.6)         | 0.5133                        | -1.62            | +0.300          |
| Pyruvate                                                     | 1.52 (0.38 – 6.08)         | 0.5547                        | +0.73            | -0.073          |
| PC ae C38:3                                                  | 10.5 (0.75 – 147)          | 0.0809                        | +6.33            | -0.020          |
| PC ae C38:4                                                  | 2.60 (0.35 – 19.4)         | 0.3509                        | +0.57            | +0.009          |
| LPC C20:3                                                    | 2.36 (0.46 – 12.1)         | 0.3016                        | +0.85            | -0.214          |
| LPC C20:4                                                    | 1.24 (0.21 – 5.01)         | 0.7657                        | -0.02            | +0.090          |
| PC ae C40:2                                                  | 2.35 (0.33 – 16.8)         | 0.3964                        | -0.82            | +0.206          |
| C18:2                                                        | 0.18 (0.02 – 1.50)         | 0.1138                        | -0.25            | -0.052          |
| <b>Aggressive prostate cancer (60 years)<sup>c</sup></b>     |                            |                               |                  |                 |
| LPC C17:0                                                    | 3.82 (1.18 – 12.4)         | 0.0258*                       | +0.80            | +0.024          |
| LPC C18:0                                                    | 4.28 (1.02 – 18.0)         | 0.0467*                       | +2.21            | -0.022          |
| Glycine                                                      | 0.48 (0.13 – 1.77)         | 0.2724                        | -0.05            | +0.104          |
| Pyruvate                                                     | 2.12 (0.78 – 5.65)         | 0.1322                        | +1.18            | -0.691          |
| PC ae C38:3                                                  | 3.85 (0.93 – 16.0)         | 0.0629                        | +0.78            | +0.050          |
| PC ae C38:4                                                  | 4.94 (1.15 – 21.2)         | 0.0313*                       | +1.98            | +0.014          |
| LPC C20:3                                                    | 2.85 (0.97 – 8.40)         | 0.0574                        | +0.64            | +0.034          |
| LPC C20:4                                                    | 1.60 (1.08 – 2.37)         | 0.0196*                       | +0.17            | +0.011          |
| PC ae C40:2                                                  | 2.16 (0.73 – 6.38)         | 0.1645                        | -0.22            | +0.141          |
| C18:2                                                        | 0.61 (0.23 – 1.59)         | 0.3078                        | +0.07            | +0.259          |

<sup>a</sup> p-values <0.05 are indicated with (\*).

<sup>b</sup> ΔOR= (OR<sub>NGT</sub> - OR<sub>crude</sub>) and Δp = (p<sub>NGT</sub> - p<sub>crude</sub>), where each corresponding OR<sub>crude</sub> and p<sub>crude</sub> is listed in Additional file 3.

<sup>c</sup> **Stratifications:** Overall prostate cancer in subjects aged 40-60 years (387/370 pairs, MS/NMR), 40-50 years (198/193, MS/NMR) and 60 years, 189/177 pairs, MS/NMR). Non-aggressive prostate cancer in subjects aged 40-60 years (311/298 pairs, MS/NMR), 40-50 years (173/168 pairs, MS/NMR) and 60 years (138/130 pairs, MS/NMR). Aggressive prostate cancer amongst subjects aged: 40-60 years (76/72 pairs, MS/NMR), 40-50 years (25/25, MS/NMR) and 60 years (51/47 pairs, MS/NMR). Note that the small sample size in some subgroups yields uncertain risk estimates.
